# Supplementary material for: Discovery of novel tubulin CBSI (R)-9k from the indanone scaffold for the treatment of colorectal cancer
Source: Royal Society of Chemistry journal article supplement (doi:10.1039/d3md00337j), 2023-01-01
Supplement: d3md00337j1.pdf [file d3md00337j1.pdf]

## SUPPORTING INFORMATION

### Discovery of Novel Tubulin CBSI (*R*)-**9k** from Indanone Scaffold for the Treatment of Colorectal Cancer

Zhipeng Huo,<sup>a</sup> Delin Min,<sup>a</sup> Shijie Zhang,<sup>a</sup> Mei-Lin Tang,<sup>\*a</sup> and Xun Sun<sup>\*ab</sup>

#### Table of Contents

|      |                                                                                                                |          |
|------|----------------------------------------------------------------------------------------------------------------|----------|
| I.   | Molecular Dynamics (MD) Simulation.....                                                                        | S2-S4.   |
| II.  | <sup>1</sup> H, <sup>13</sup> C NMR and HRMS Spectra of Targeted Compounds <b>9a-q</b> (racemates) S5-<br>S30. |          |
| III. | <sup>1</sup> H and <sup>13</sup> C NMR Spectra of Key Intermediates <b>11</b> and <b>13</b> .....              | S31-S32. |
| IV.  | X-Ray Structures of ( <i>R</i> )- <b>9k</b> .....                                                              | S33-S34. |

### 2.2.10 Molecular Dynamics (MD) Simulation

To better comprehend the activity results and explore related SARs, 300 ns MD simulations were performed for the representative compounds (**R**)-**9k** and (**S**)-**9k**, respectively. In this computational study, we aimed to investigate their binding modes with the colchicine site in tubulin (PDB Code: 1SA0) using Desmond, Schrodinger suites 2022-1 with default settings.<sup>1,2</sup>

#### 2.2.10.1 Ligand Induced Structural Stability

In order to compare the structural effects of both compounds ((**R**)-**9k** and (**S**)-**9k**) when bound at the colchicine binding site, we looked into the structural dynamics of the proteins by estimating the root mean square deviation (RMSD), fluctuation (RMSF) as RMSD and RMSF analysis could reveal the dynamics and motions of constituent atoms and per-residue fluctuation, respectively.

As illustrated in Fig. S1A, (**R**)-**9k** (shown in red) presented a substantially constant RMSD value during simulation, while (**S**)-**9k** (shown in blue) displayed a fluctuating variation between 1.0 and 2.0 Å. Compared with (**S**)-**9k** bound system, the protein was structurally more stable in the presence of (**R**)-**9k** with a relatively steady RMSD value (3.0 Å) (Fig. S1B). In other words, the binding of (**R**)-**9k** in this region could be more settled than that of (**S**)-**9k**. In addition, we further measured relative motions of both compounds at the tubulin dimers over the simulation period. Notably, the motions of specific individual residues in tubulin dimers were higher in the presence of (**R**)-**9k**, likely due to complementary interactions mediated by the compound. However, specific individual residues in the colchicine binding site did not show a significant difference in the presence of (**R**)-**9k** or (**S**)-**9k** (Fig. S1C).

#### 2.2.10.2 Differential Binding Mechanisms Study of (**S**)-**9k** and (**R**)-**9k** to Tubulin Colchicine Site

While analyzing the dynamics and structural motions of the target protein in the existence of binding agents, we also investigated the molecular mechanics with generalized Born surface area (MM-GBSA) scoring analyses ( $\Delta G$ , kcal/mol), representing ligand binding affinities to the colchicine binding site. As shown in Table S1, a lower  $\Delta G_{\text{bind}}$  was associated with the binding of (**R**)-**9k** at the colchicine binding site, compared with (**S**)-**9k**, and such a significant energy difference ( $-7.83$  kcal/mol) could be sufficient to support that (**R**)-**9k** bound to colchicine binding site with a higher affinity than (**S**)-**9k**. Regarding the energy contributions from various interactions, coulomb energies changed from  $-6.72$  kcal/mol for (**S**)-**9k** to  $-10.61$  kcal/mol for (**R**)-

**9k**, while both  $\pi$ - $\pi$  packing and Van der Waals energies varied in the same direction by 0.82 and 3.05 kcal/mol, respectively. These results indicated the high affinity binding of (*R*)-**9k** was mostly influenced by coulomb, vdW and  $\pi$ - $\pi$  stacking energies relative to (*S*)-**9k**. The calculation of lipophilic energy ( $\Delta G_{\text{lipo}}$ ) also supported that the binding of (*R*)-**9k** was more advantageous in the hydrophobic colchicine binding site compared to (*S*)-**9k**.

### 2.2.10.3 Molecular Docking

The binding mode and key interactions between (*R*)-**9k** and tubulin (PDB code: 1SA0) were investigated by molecular docking. As depicted in Fig. S2A, the hydrogen bond formed between the 9-carbonyl group of cyclo-hepta-trienone in colchicine with Val 181 (shown in yellow dashed line) was replaced by introducing the fluorine atom at the 3-phenyl ring of (*R*)-**9k** (shown in yellow). Meantime, (*R*)-**9k** could form additional hydrogen bonds with water molecules from the methoxy group in A ring and the ethoxy group at the 3-phenyl ring. Further analysis of the docking results (Fig. S2B) showed that the fluorine atom of (*R*)-**9k** fully superimposed with the tropolone of colchicine (shown in red) and the cavity at the binding site of the fluorine atom was too narrow and small to accommodate any larger substituents, which could explain the SARs we observed.

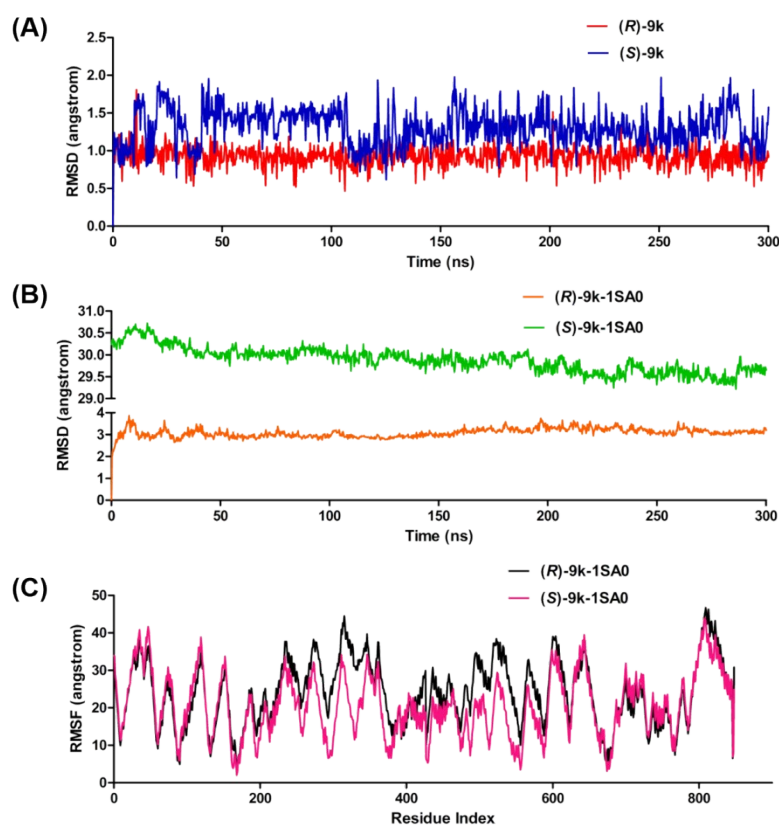

**Fig. S1 (A) RMSD graph for the 300 ns simulation trajectory of (R)-9k and (S)-9k. (B) RMSD graph for the 300 ns simulation trajectory of (R)-9k/1SA0 complex and (S)-9k/1SA0 complex. (C) RMSF graph for the 300 ns simulation trajectory of (R)-9k/1SA0 complex and (S)-9k/1SA0 complex.**

**Table S1** MM/GBSA energy calculations.

| Binding energies<br>(kcal/mol) | $\Delta G_{\text{Bind}}$ | $\Delta G_{\text{Bind}}$<br>_Coulomb | $\Delta G_{\text{Bind}}$<br>_Covalent | $\Delta G_{\text{Bind}}$<br>_Lipo | $\Delta G_{\text{Bind}}$<br>_Packing | $\Delta G_{\text{Bind}}$<br>_Solv_GB | $\Delta G_{\text{Bind}}$<br>_vdW |
|--------------------------------|--------------------------|--------------------------------------|---------------------------------------|-----------------------------------|--------------------------------------|--------------------------------------|----------------------------------|
| <b>(S)-9k</b>                  | -40.05                   | -6.72                                | 1.97                                  | -13.78                            | -0.3                                 | 17.79                                | -38.65                           |
| <b>(R)-9k</b>                  | -47.88                   | -10.61                               | 2.69                                  | -15.13                            | -1.12                                | 18.37                                | -41.70                           |

$\Delta G_{\text{Bind}}$  = total binding free energy;  $\Delta G_{\text{Bind\_Coulomb}}$  = coulomb energy;  $\Delta G_{\text{Bind\_Covalent}}$  = covalent binding energy;  $\Delta G_{\text{Bind\_Lipo}}$  = lipophilic energy;  $\Delta G_{\text{Bind\_Packing}}$  = pi-pi packing correction;  $\Delta G_{\text{Bind\_Solv\_GB}}$  = Generalized Born electrostatic solvation energy;  $\Delta G_{\text{Bind\_vdW}}$  = Van der Waals energy.

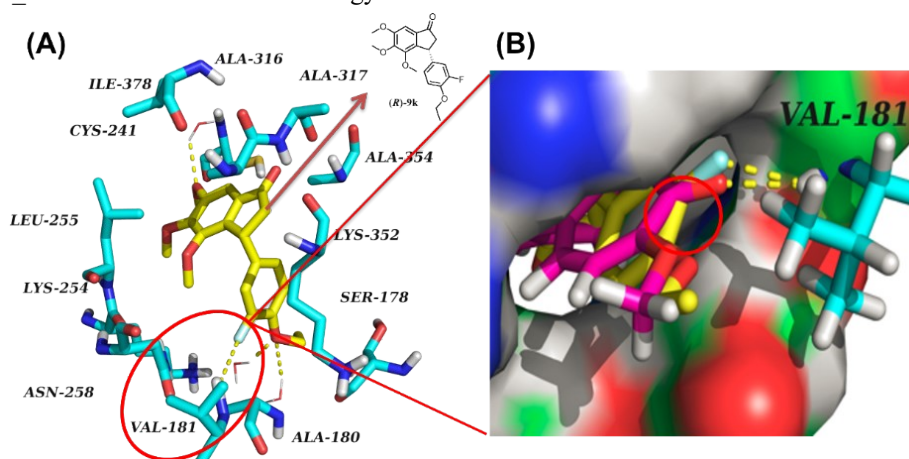

**Fig. S2 (A) Proposed binding mode of (R)-9k (yellow stick) with tubulin (PDB code: 1SA0). (B) Overlapping between colchicine (red stick) and (R)-9k, hydrogen bonds are shown as yellow dashed lines.**

## References

- 1 M. Saurov, N. Tufan, B. Kunal et al., *Front Pharmacol.*, 2022, **13**, 805344.
- 2 J. Li, R. Abel and K. Zhu, et al., *Proteins*, 2011, **79**, 2794-2812.

Compounds **9a-q** were fully characterized by  $^1\text{H}$  NMR,  $^{13}\text{C}$  NMR and HRMS.

4,5,6-Trimethoxy-3-(4-methoxyphenyl)-2,3-dihydro-1H-inden-1-one (**9a**)

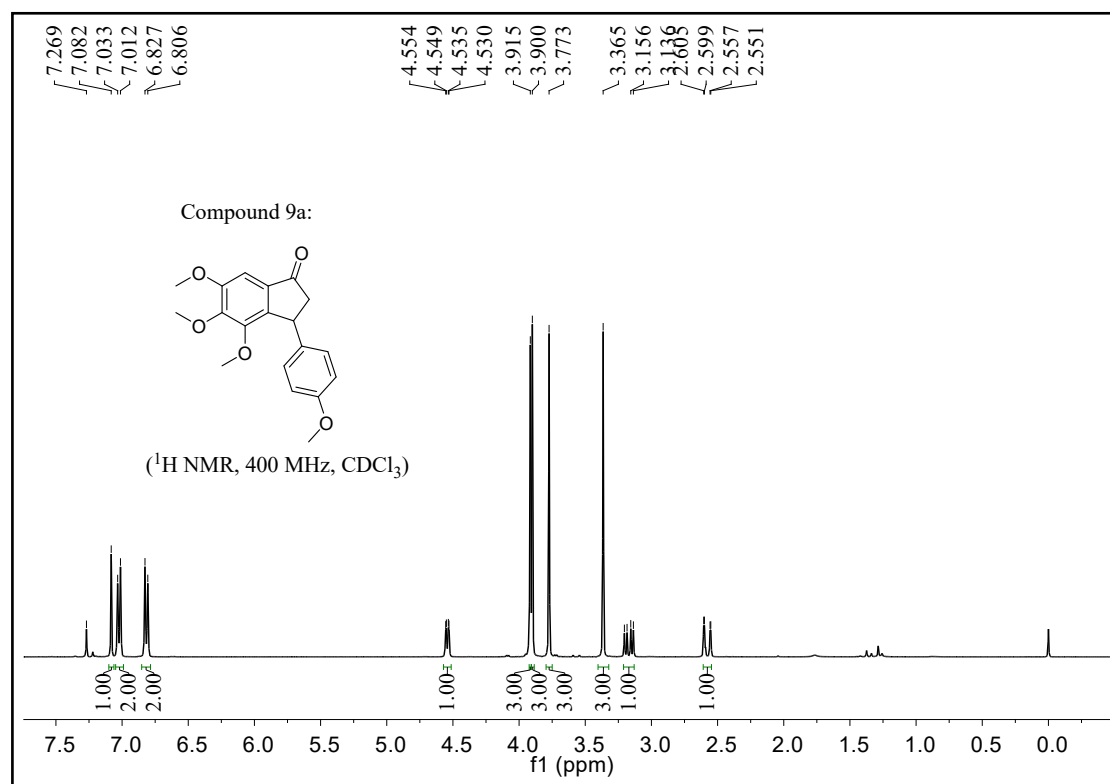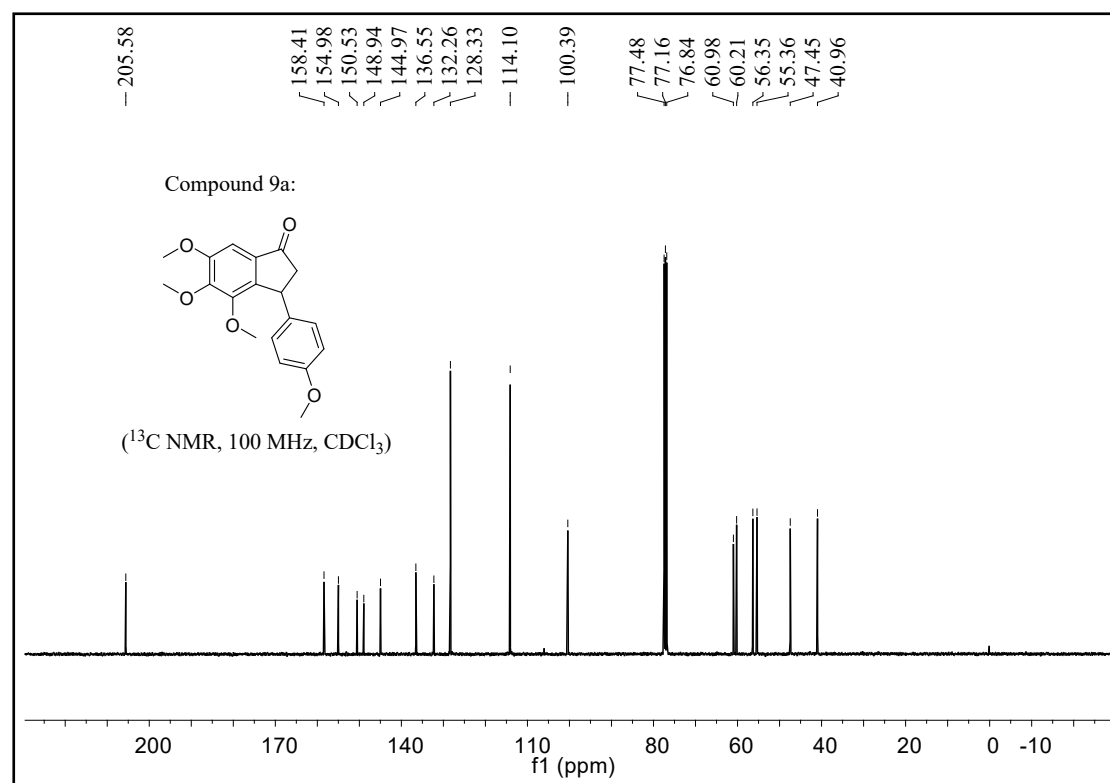

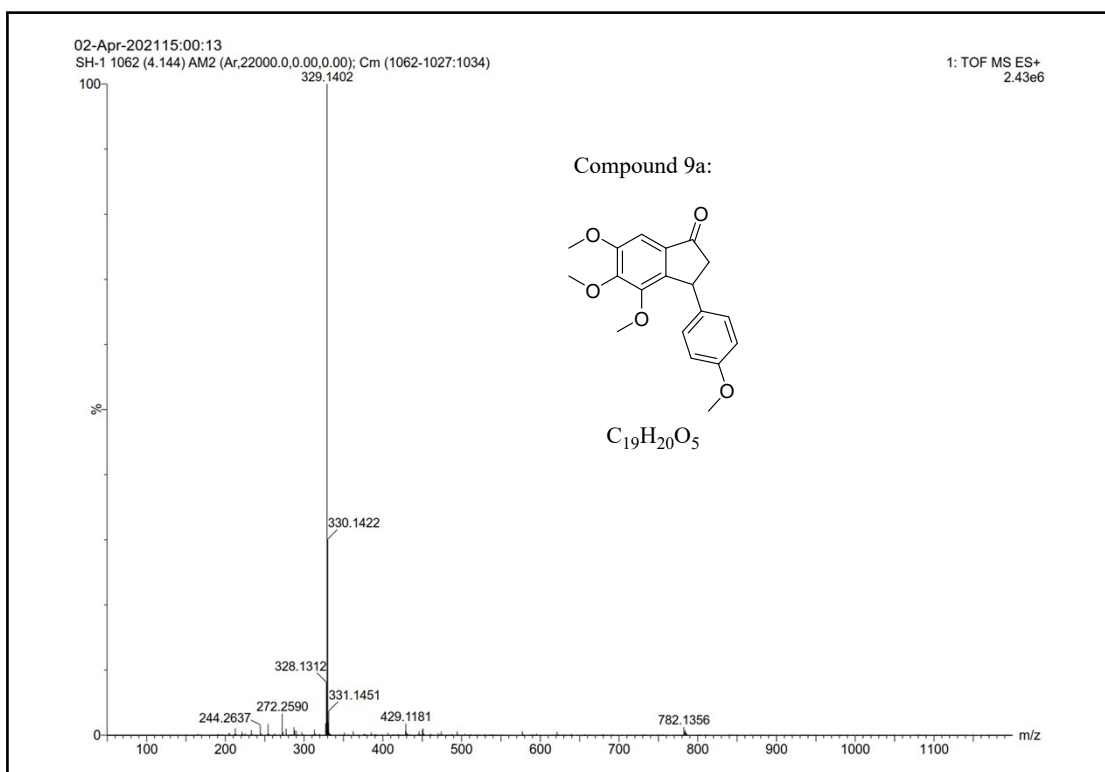

3-(3-Fluoro-4-methoxyphenyl)-4,5,6-trimethoxy-2,3-dihydro-1H-inden-1-one (**9b**)

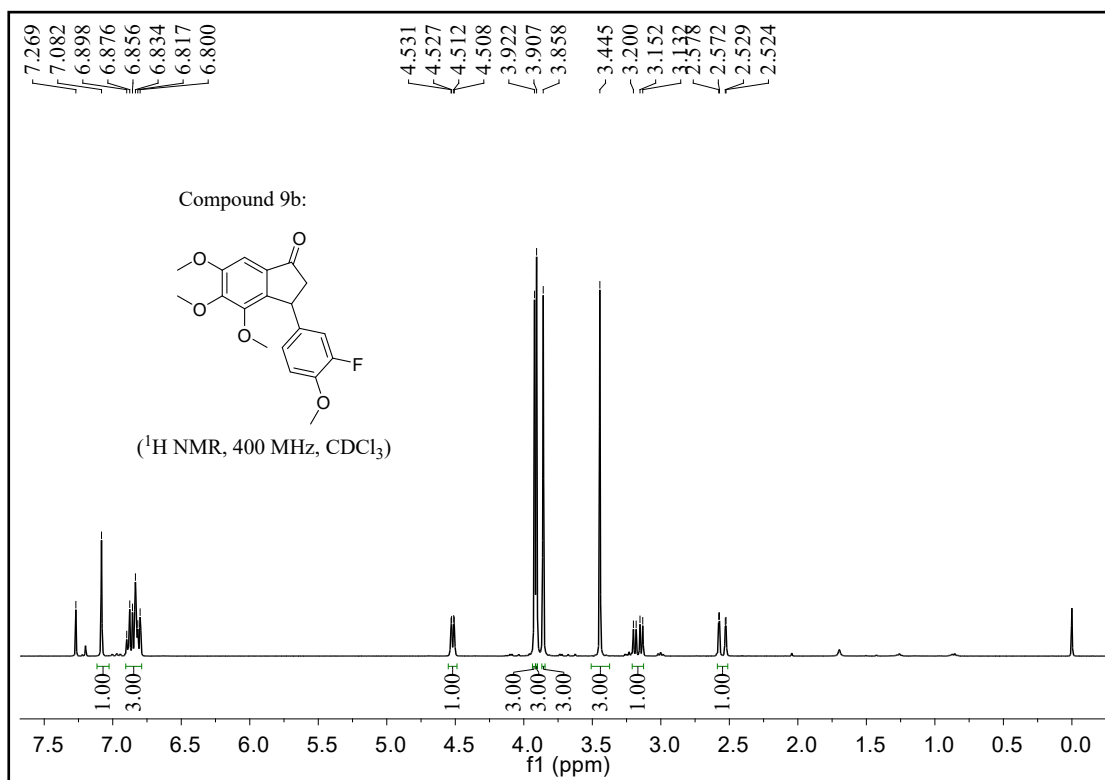

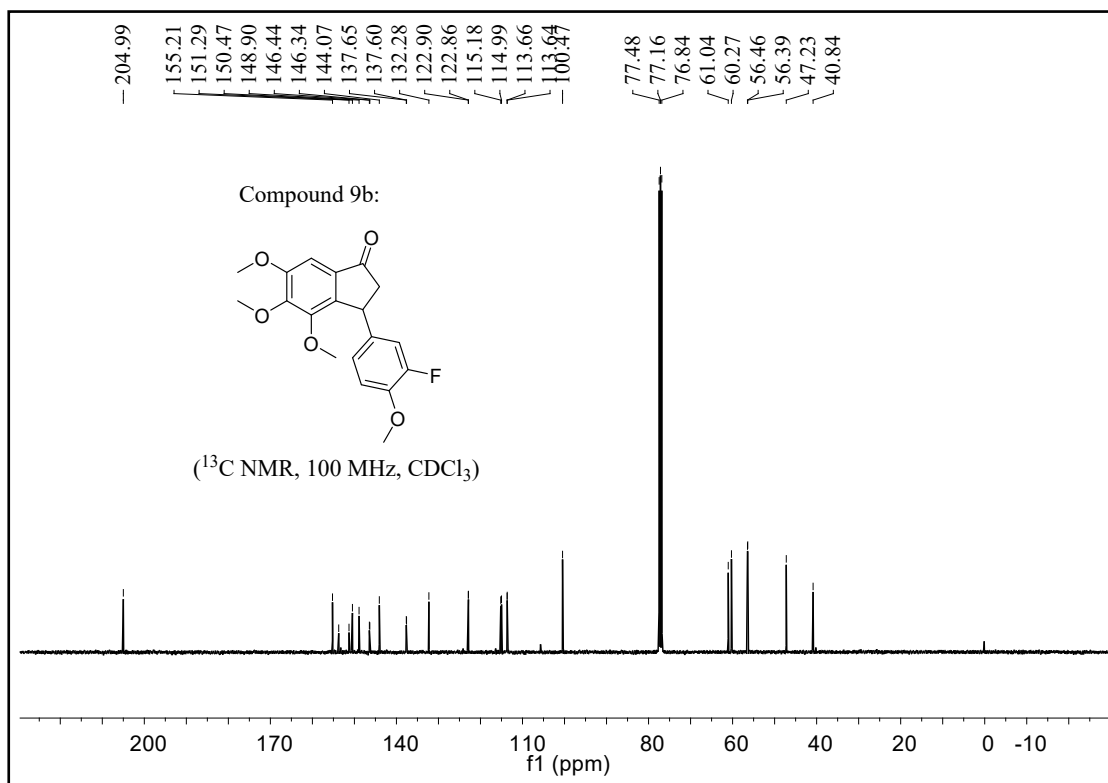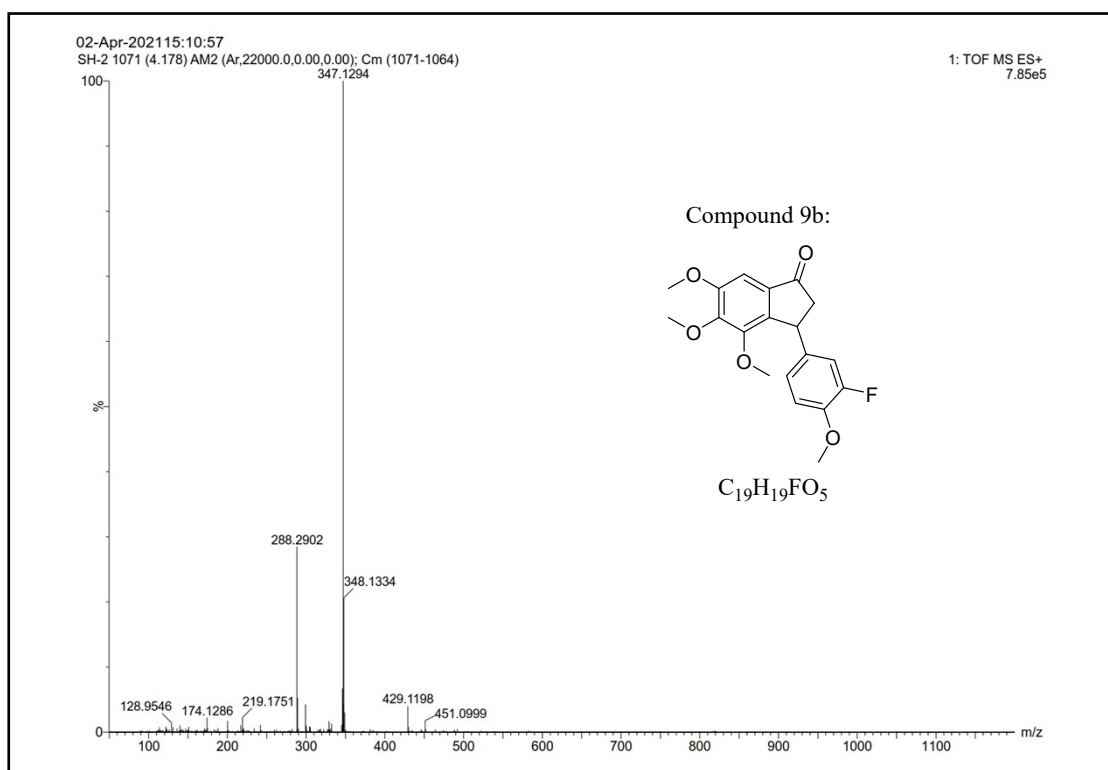

3-(3-Chloro-4-methoxyphenyl)-4,5,6-trimethoxy-2,3-dihydro-1H-inden-1-one (**9c**)

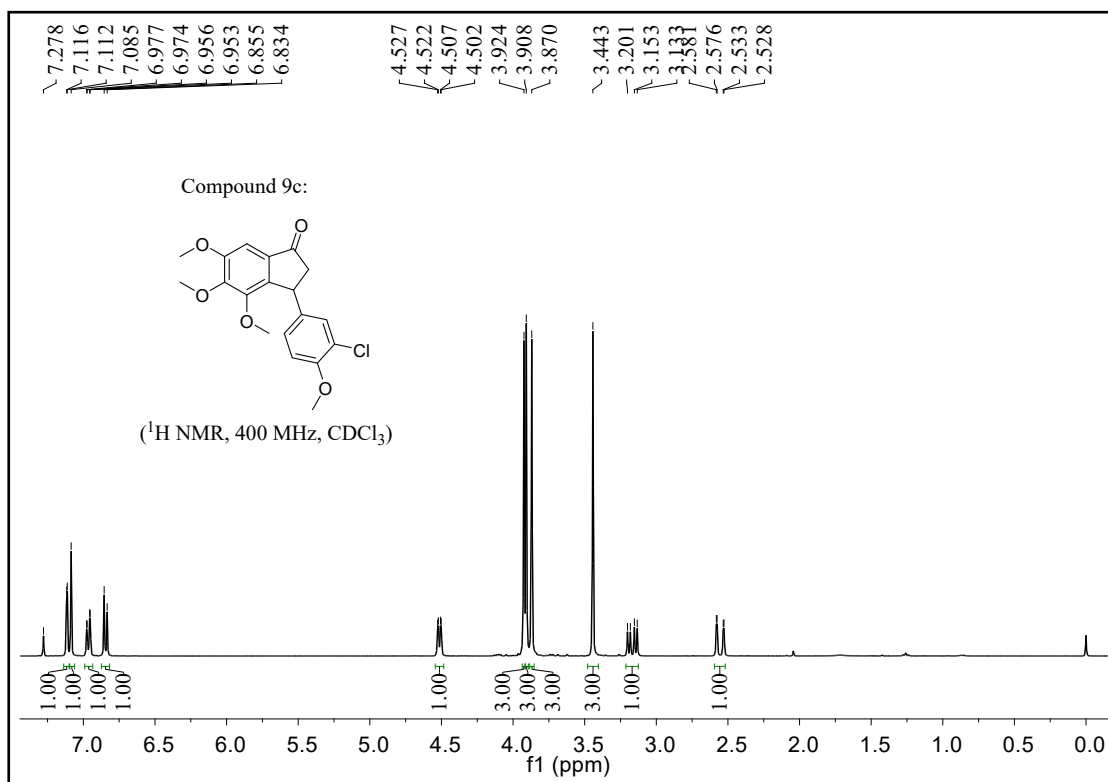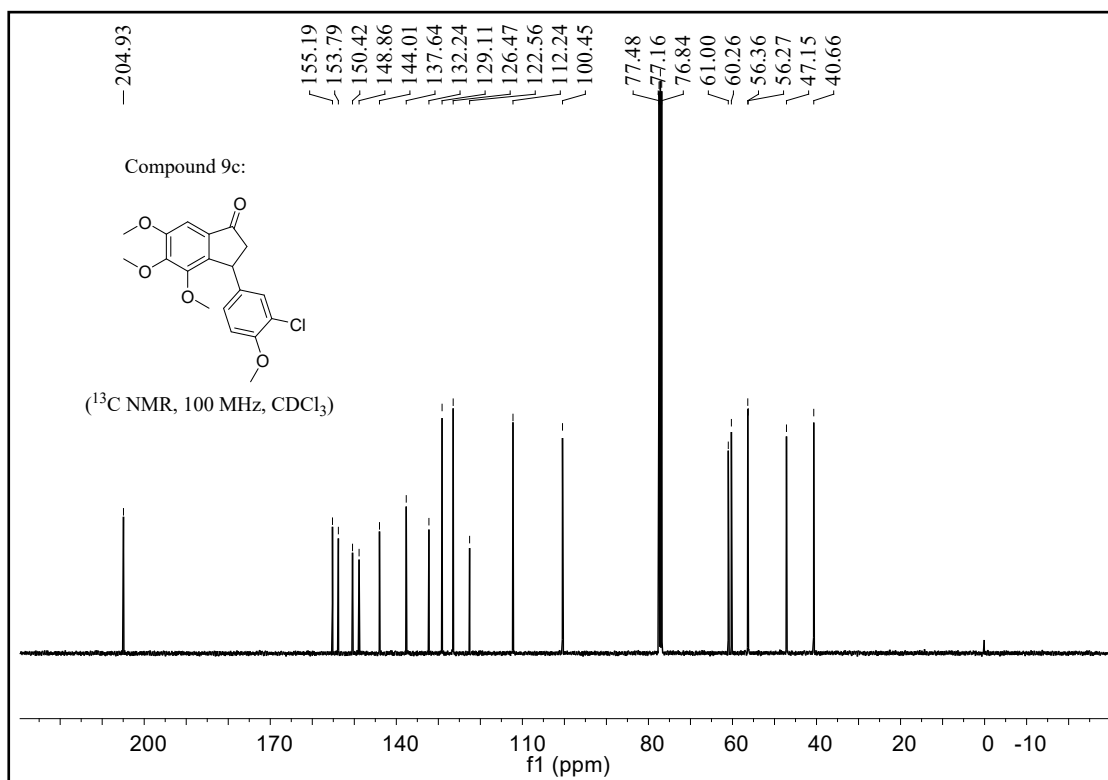



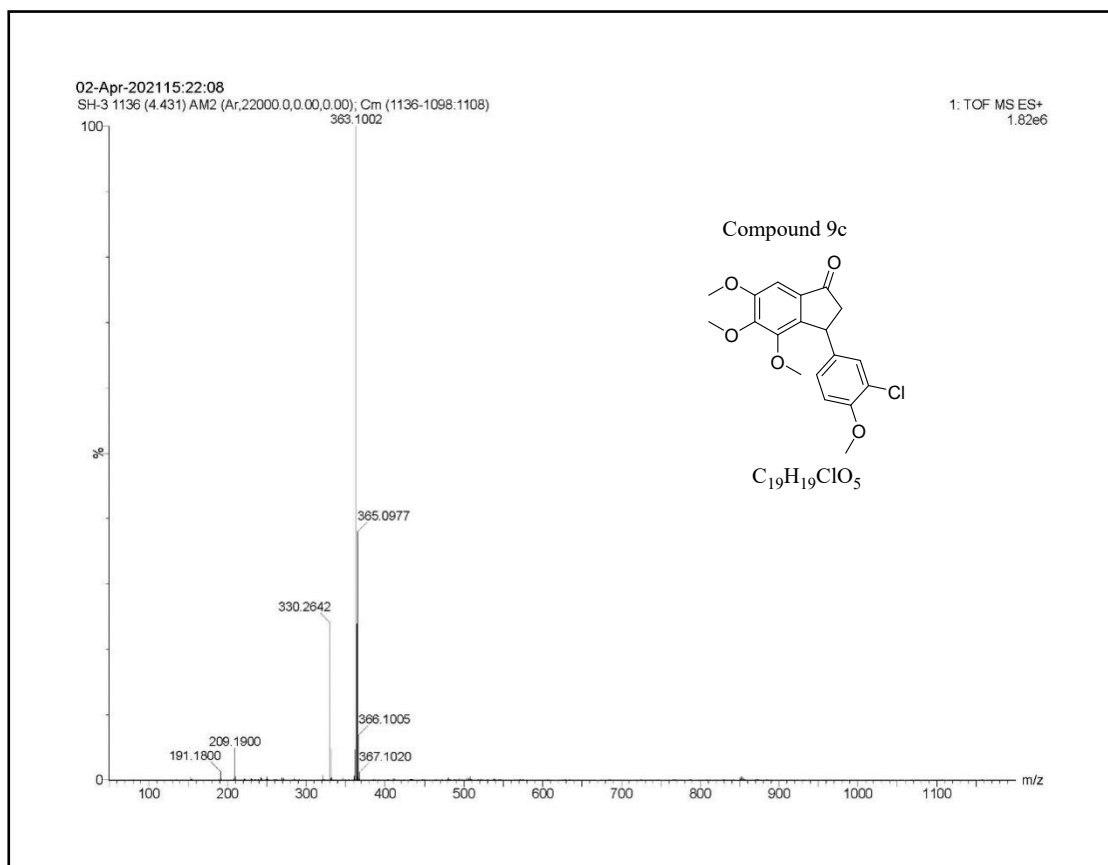

3-(3-Bromo-4-methoxyphenyl)-4,5,6-trimethoxy-2,3-dihydro-1H-inden-1-one (**9d**)

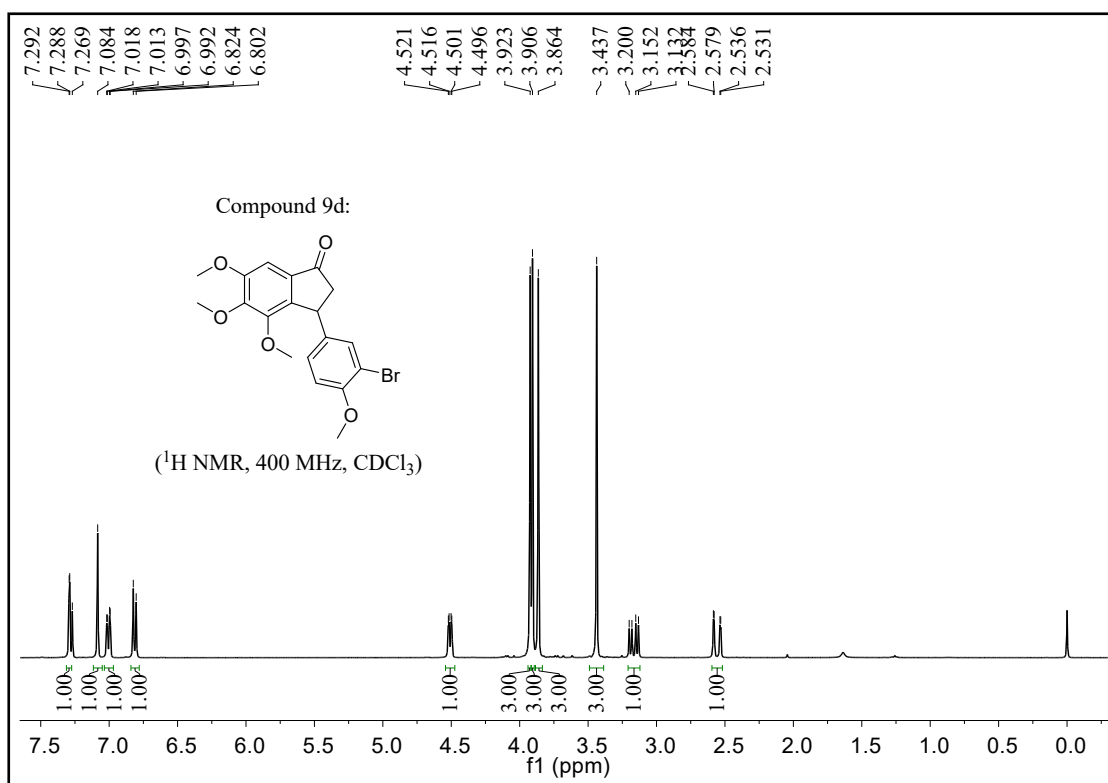

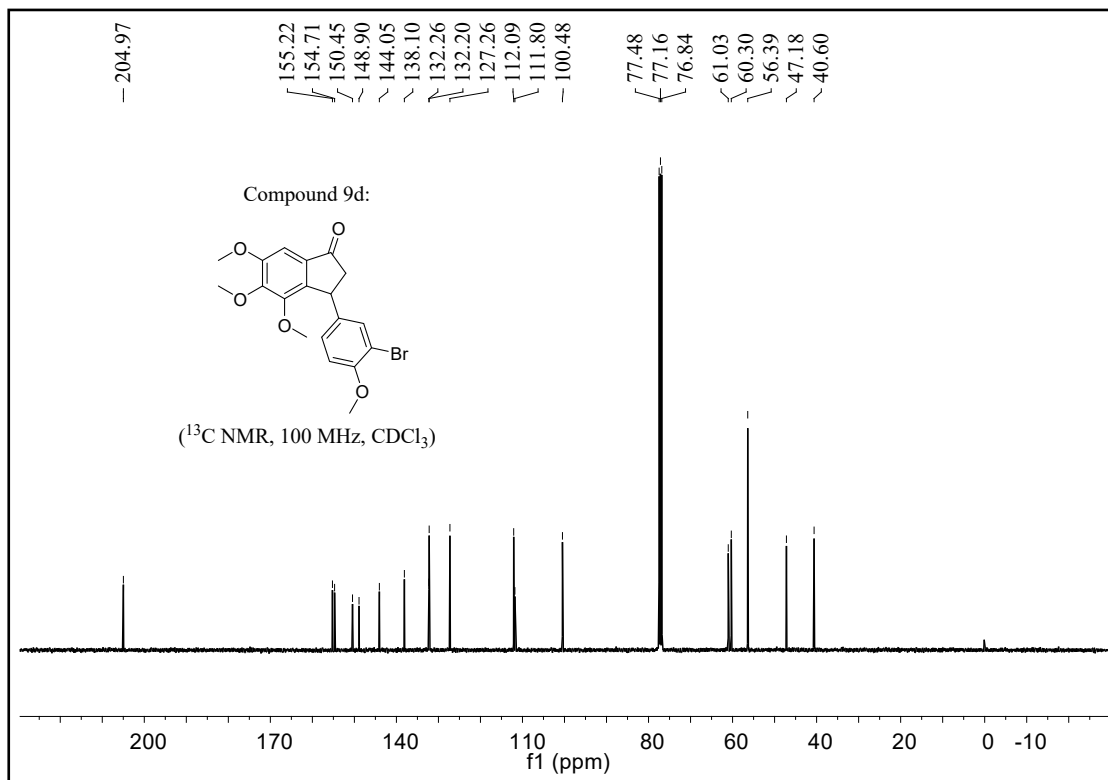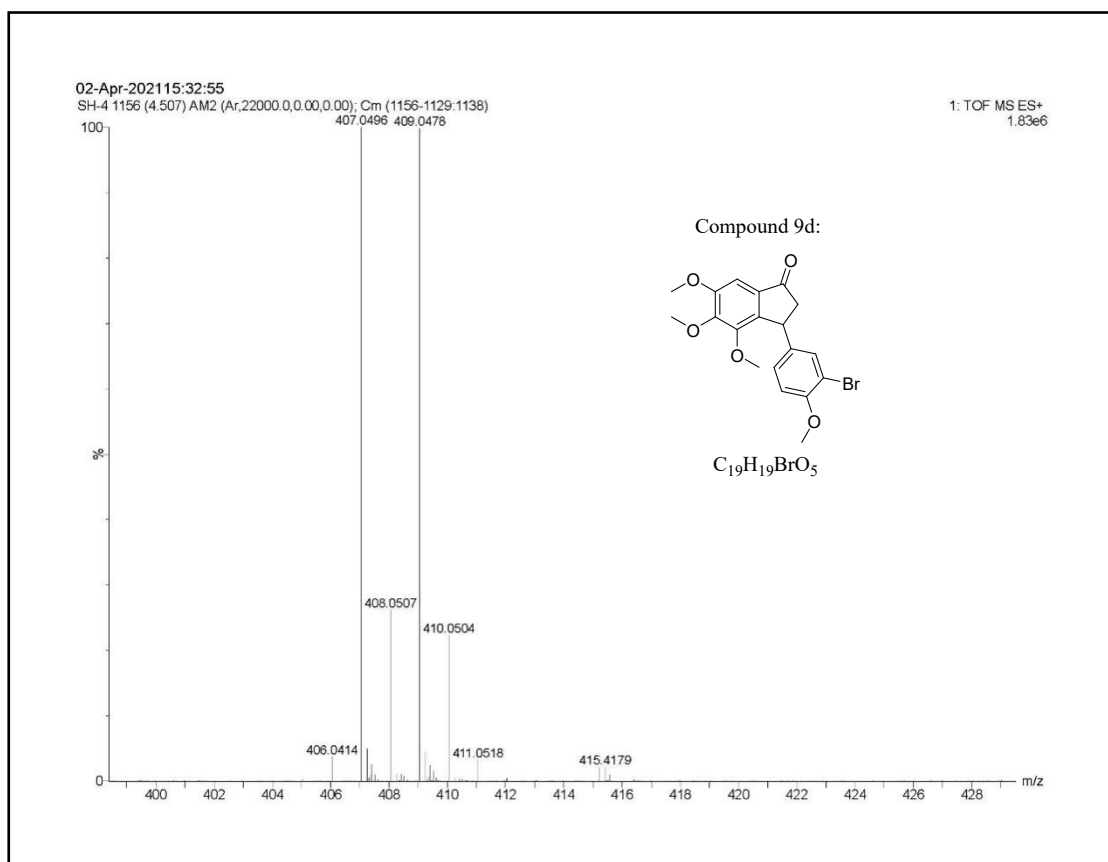

3-(3-Iodo-4-methoxyphenyl)-4,5,6-trimethoxy-2,3-dihydro-1H-inden-1-one (**9e**)

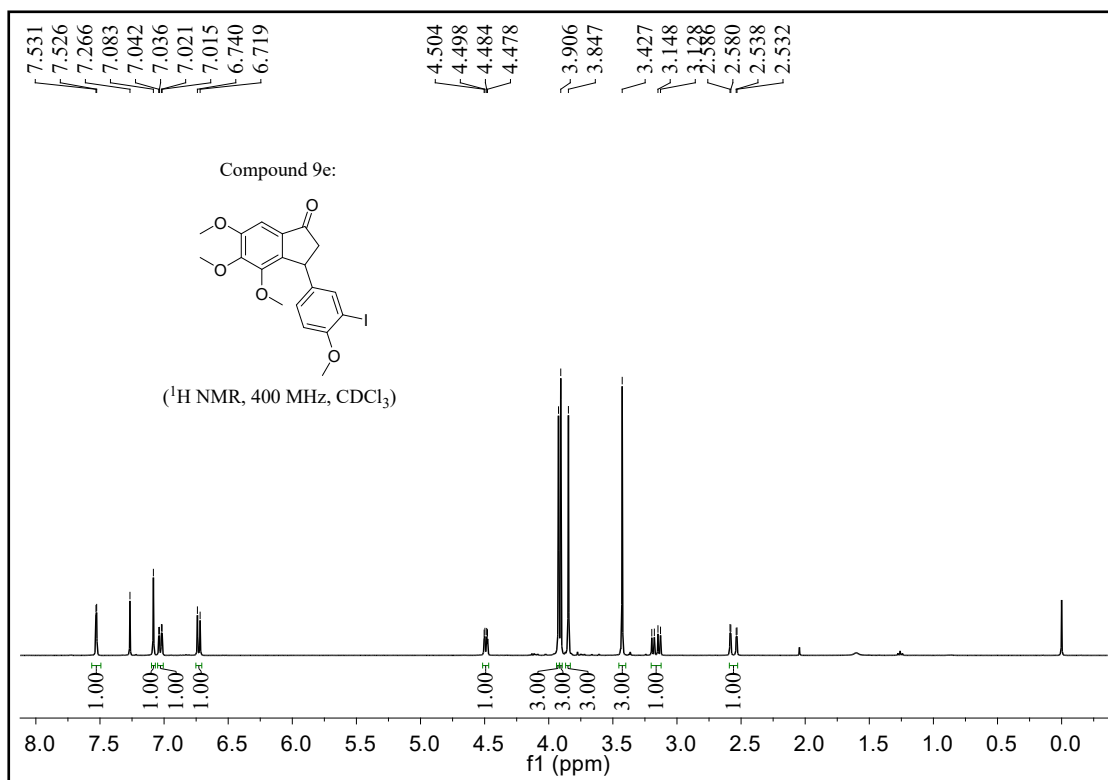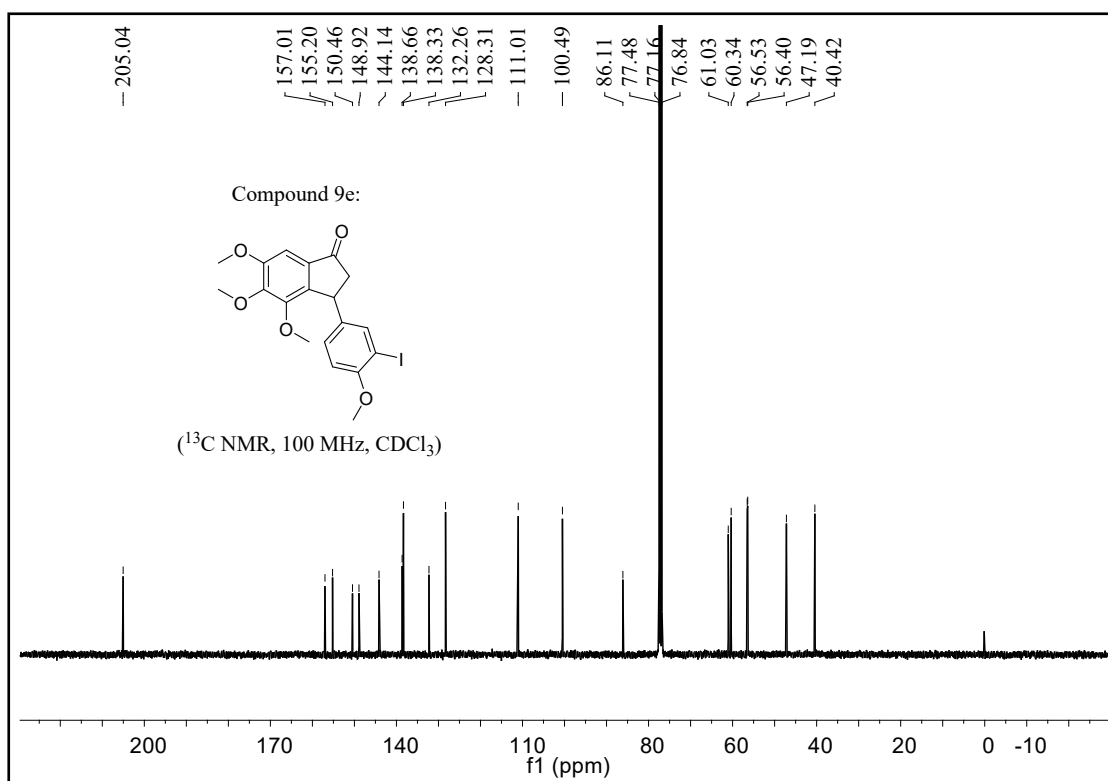

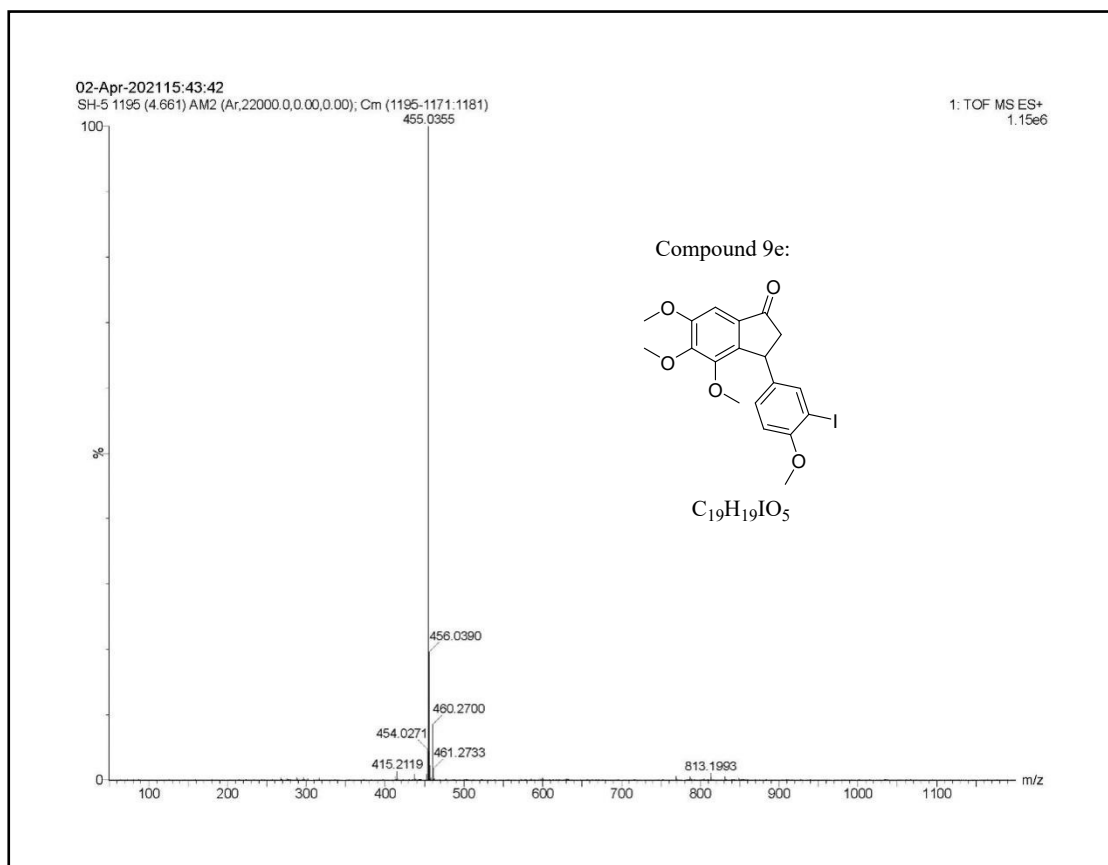

4,5,6-Trimethoxy-3-(4-methoxy-3-nitrophenyl)-2,3-dihydro-1H-inden-1-one (**9f**)

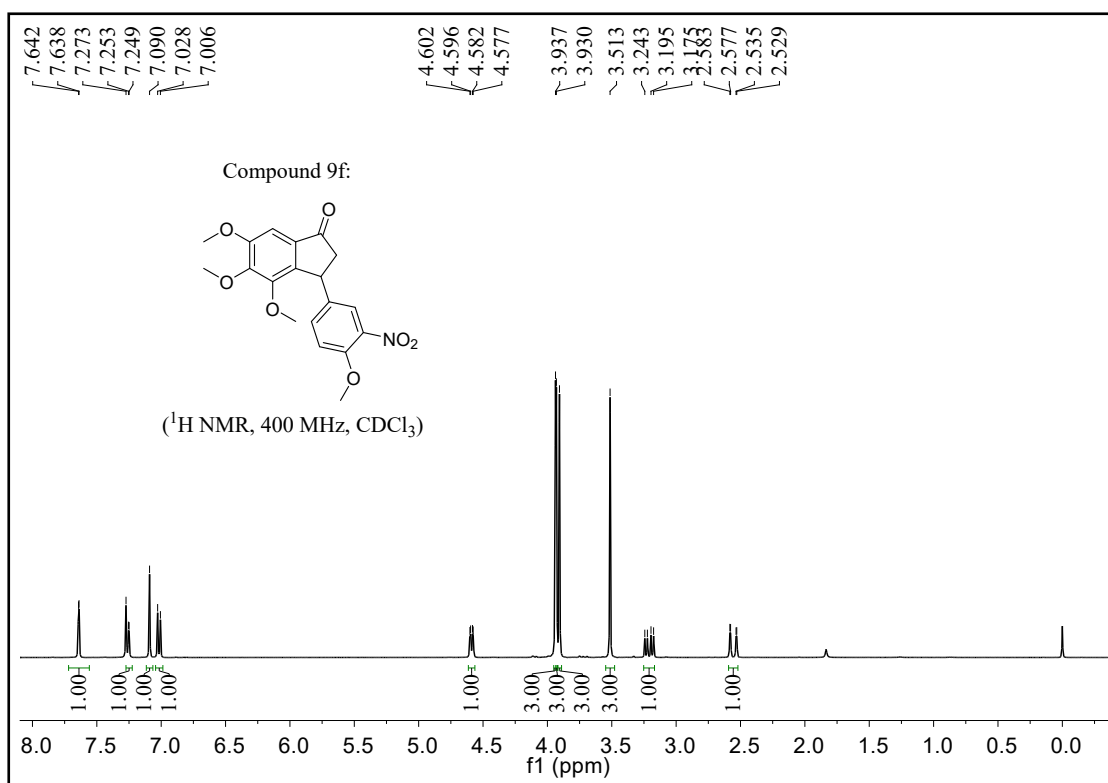

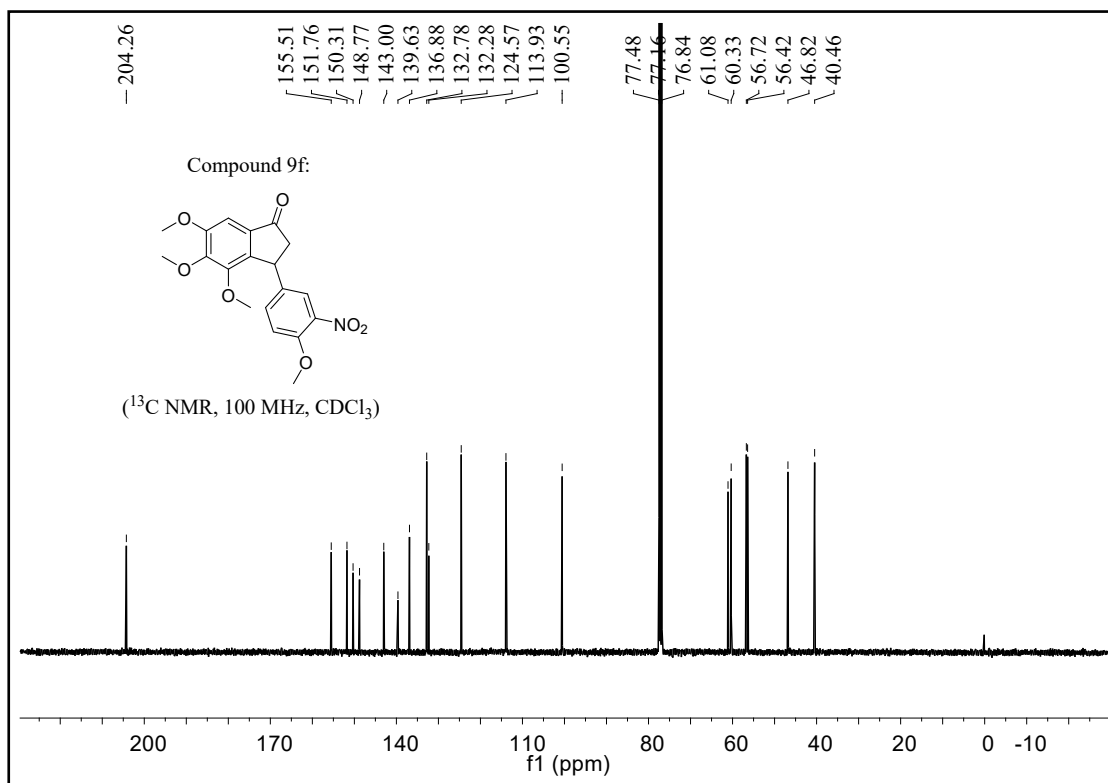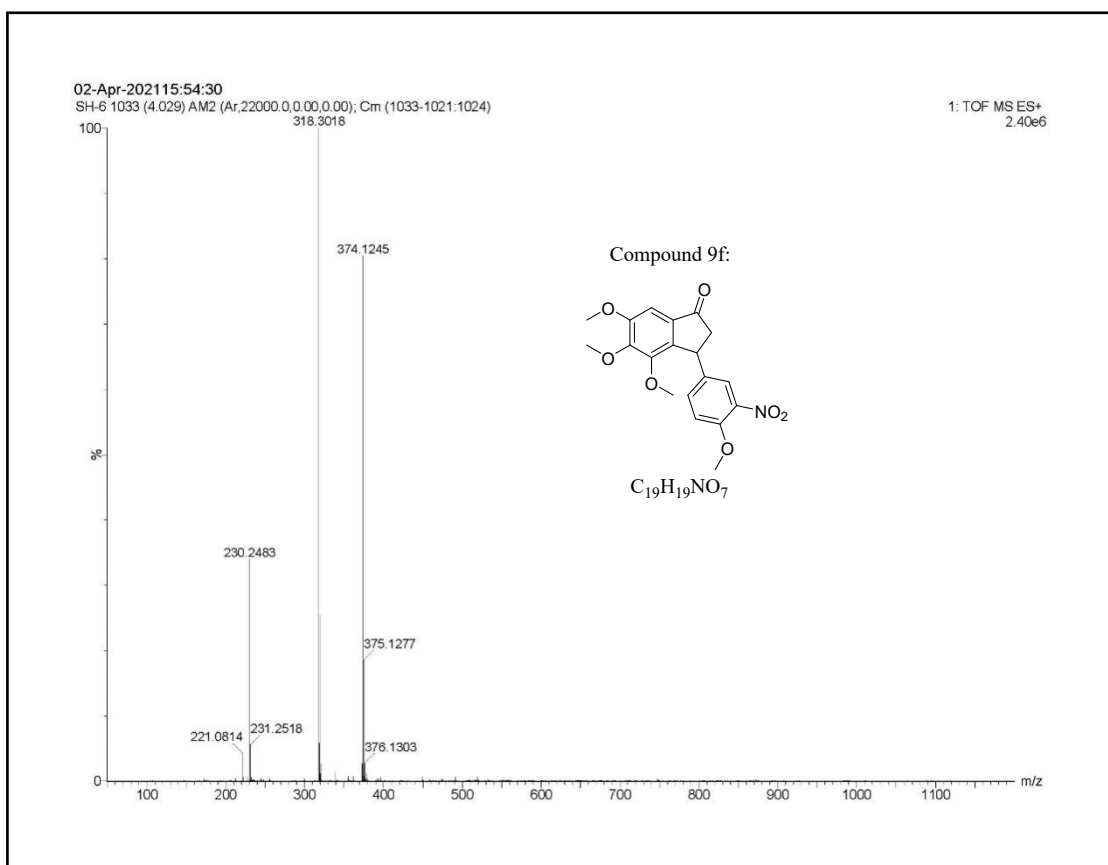

3-(3,4-Dimethoxyphenyl)-4,5,6-trimethoxy-2,3-dihydro-1H-inden-1-one (9g)

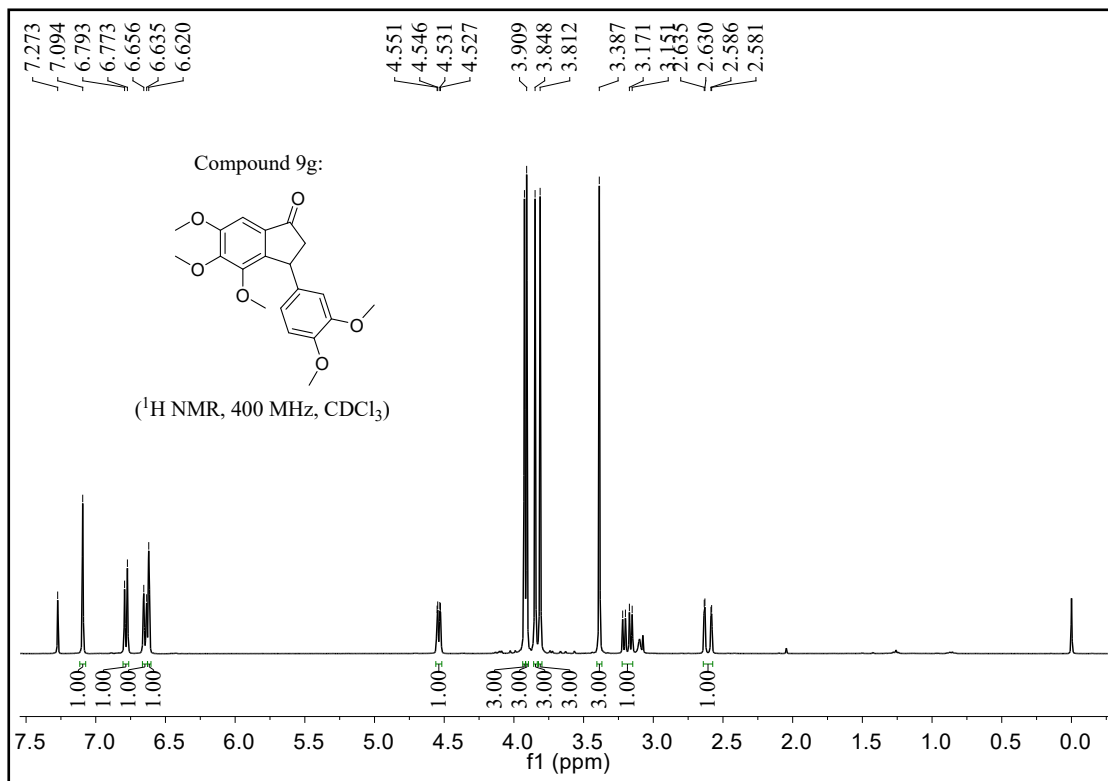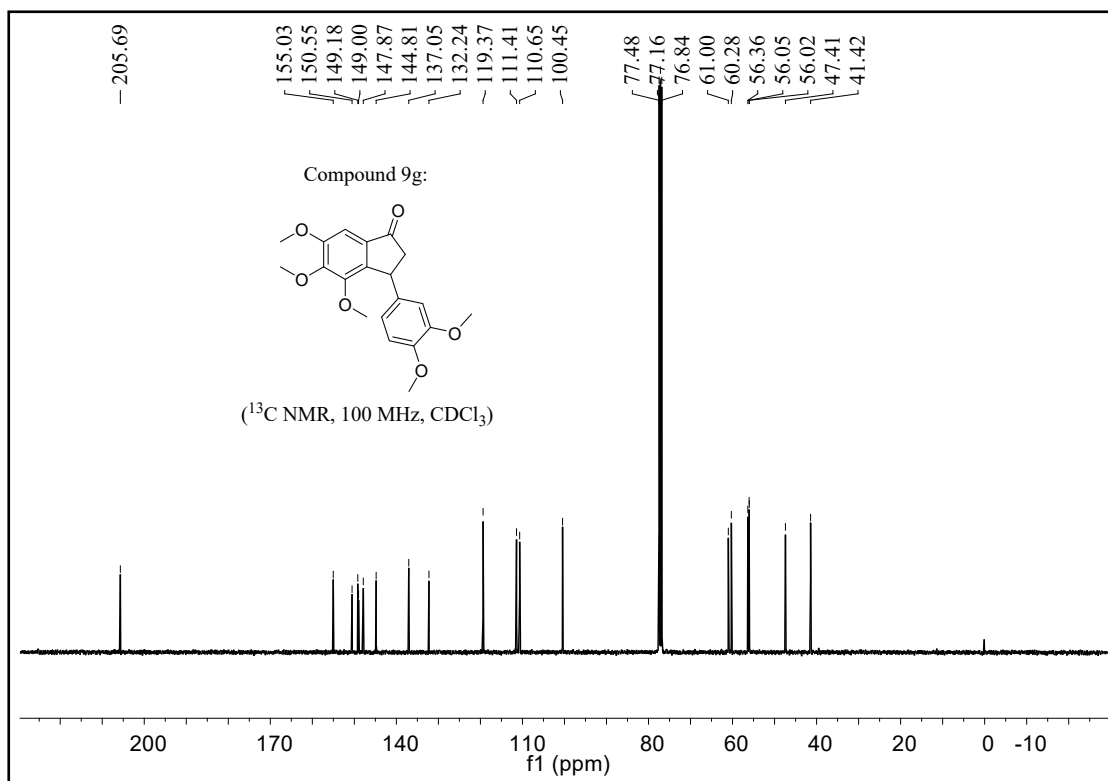

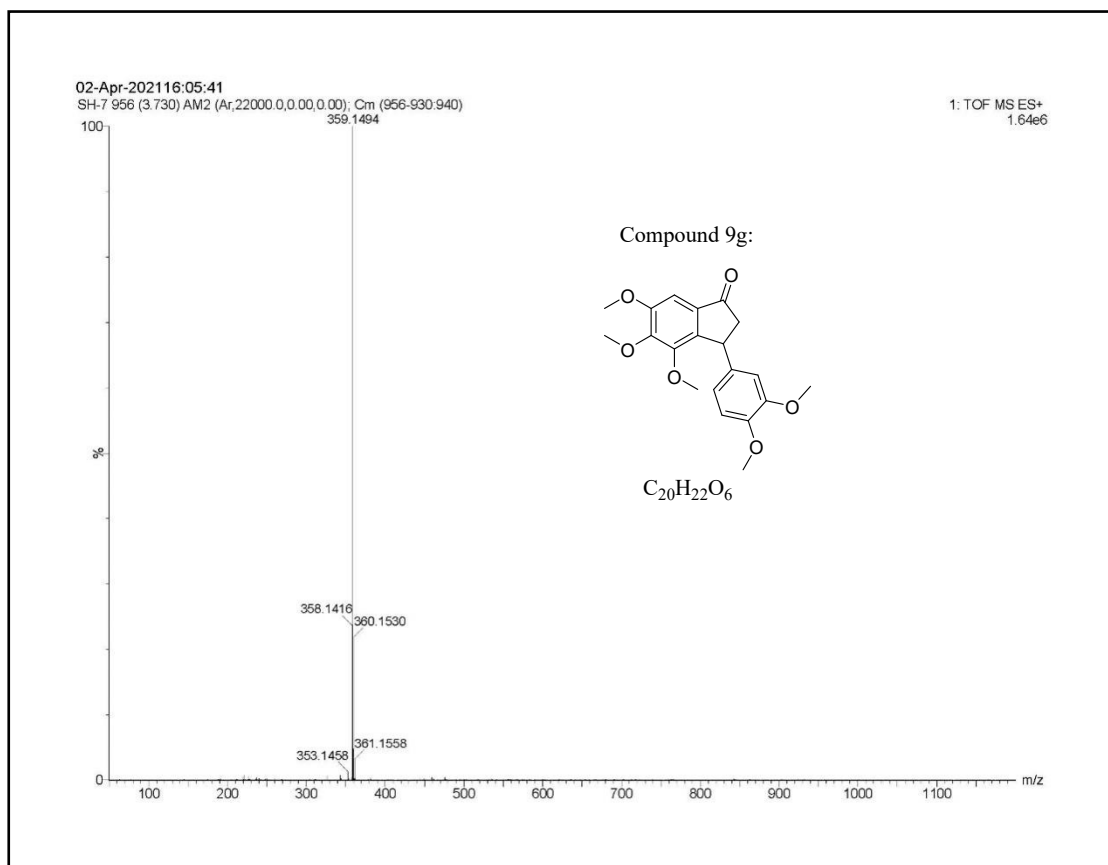

3-(3,5-Dimethoxyphenyl)-4,5,6-trimethoxy-2,3-dihydro-1H-inden-1-one (**9h**)

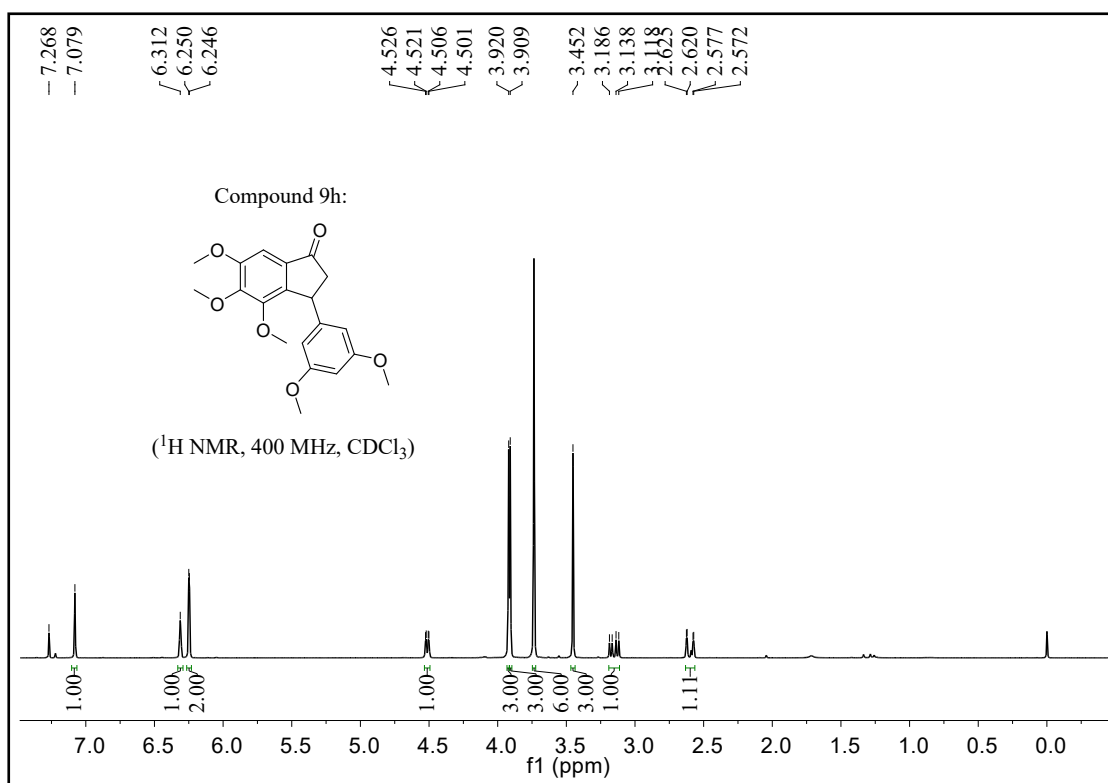

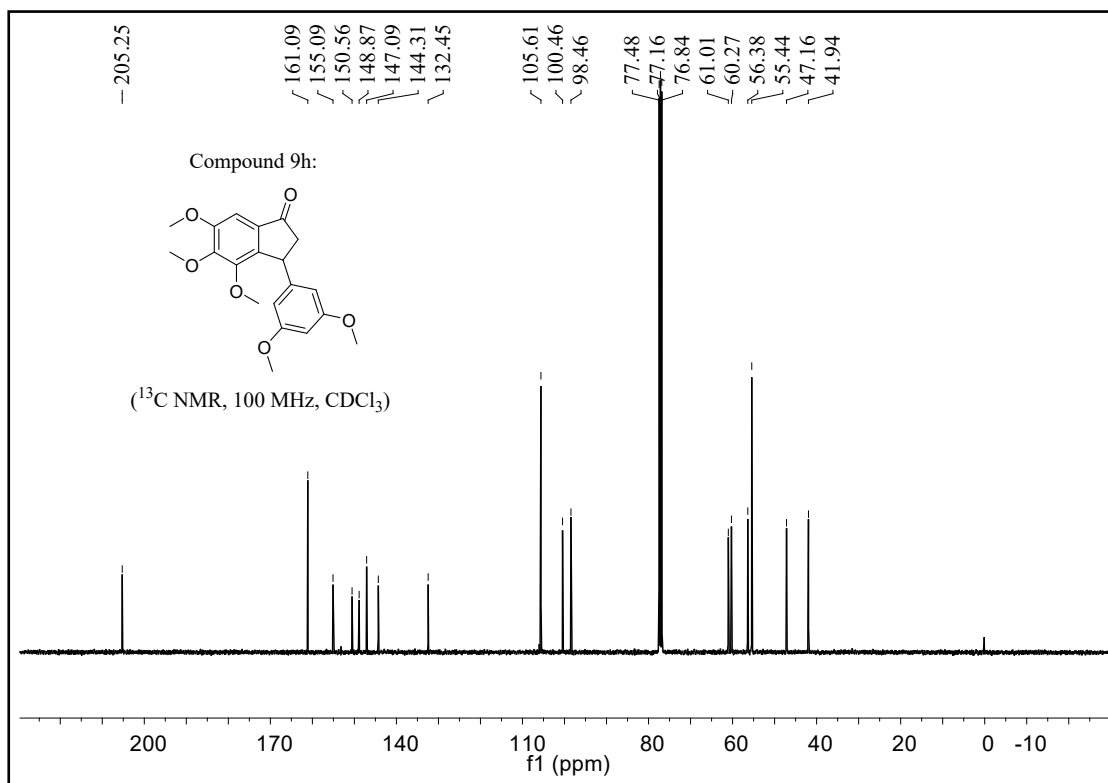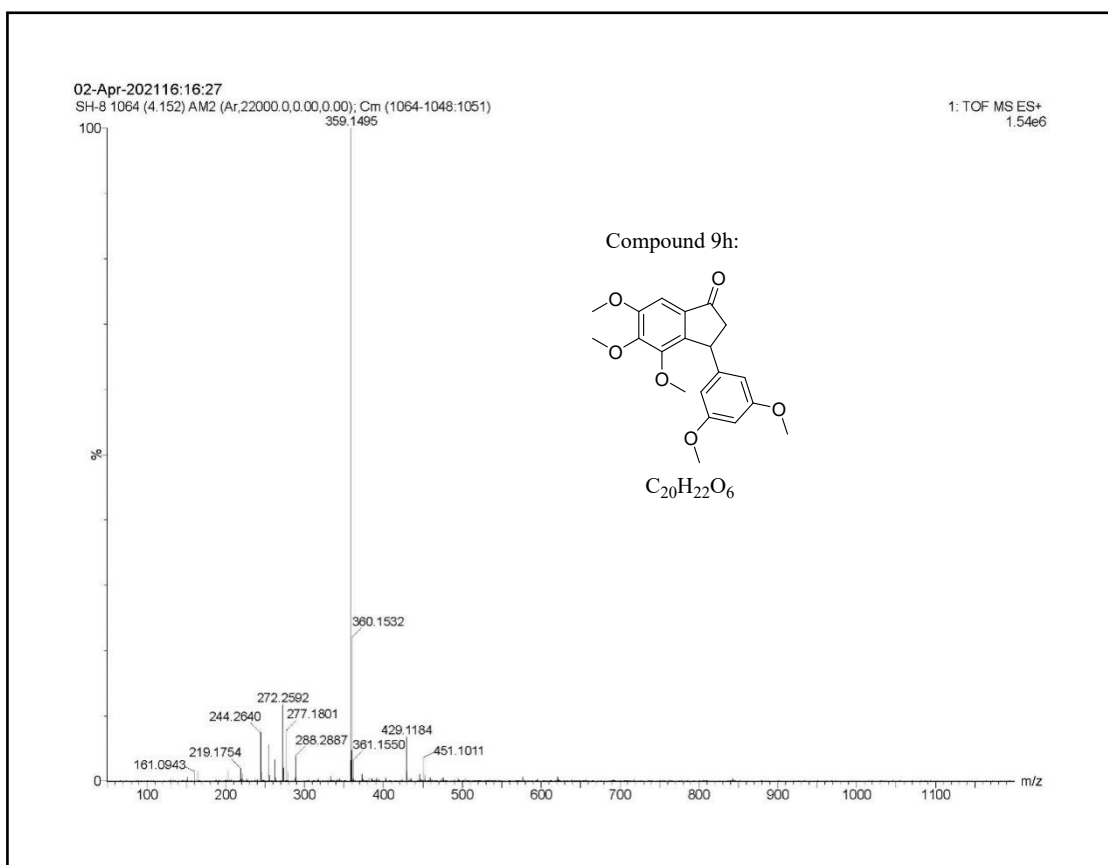



4,5,6-Trimethoxy-3-(3,4,5-trimethoxyphenyl)-2,3-dihydro-1H-inden-1-one (**9i**)

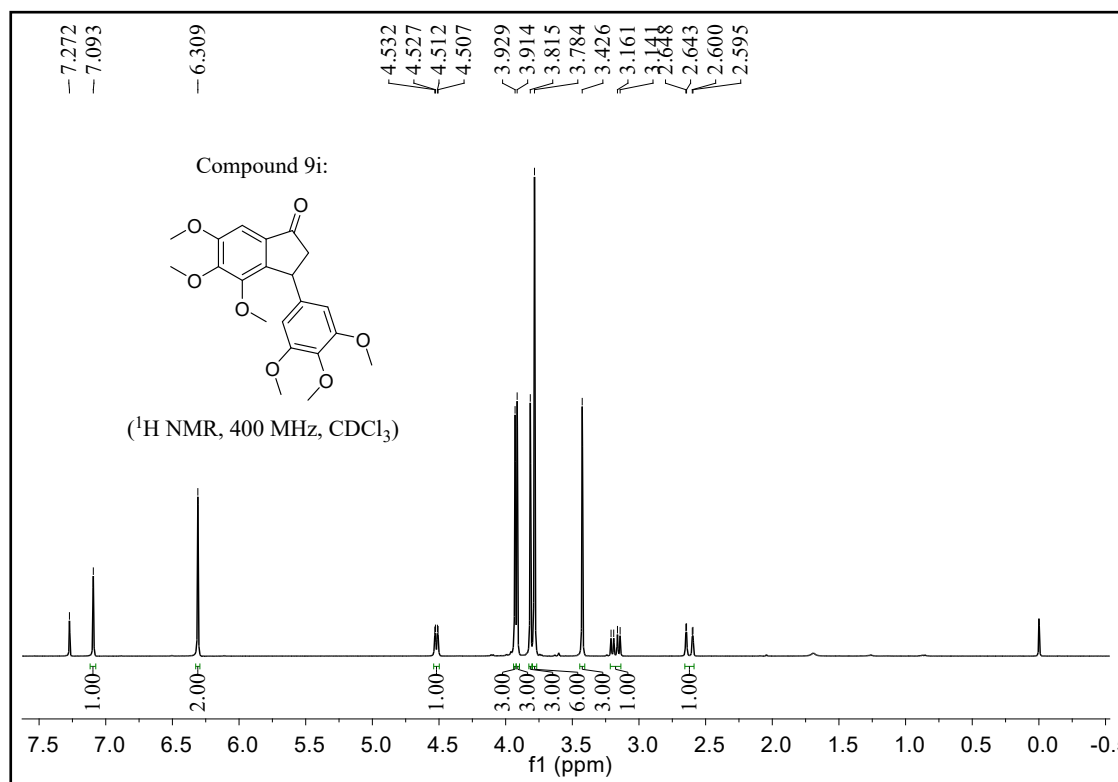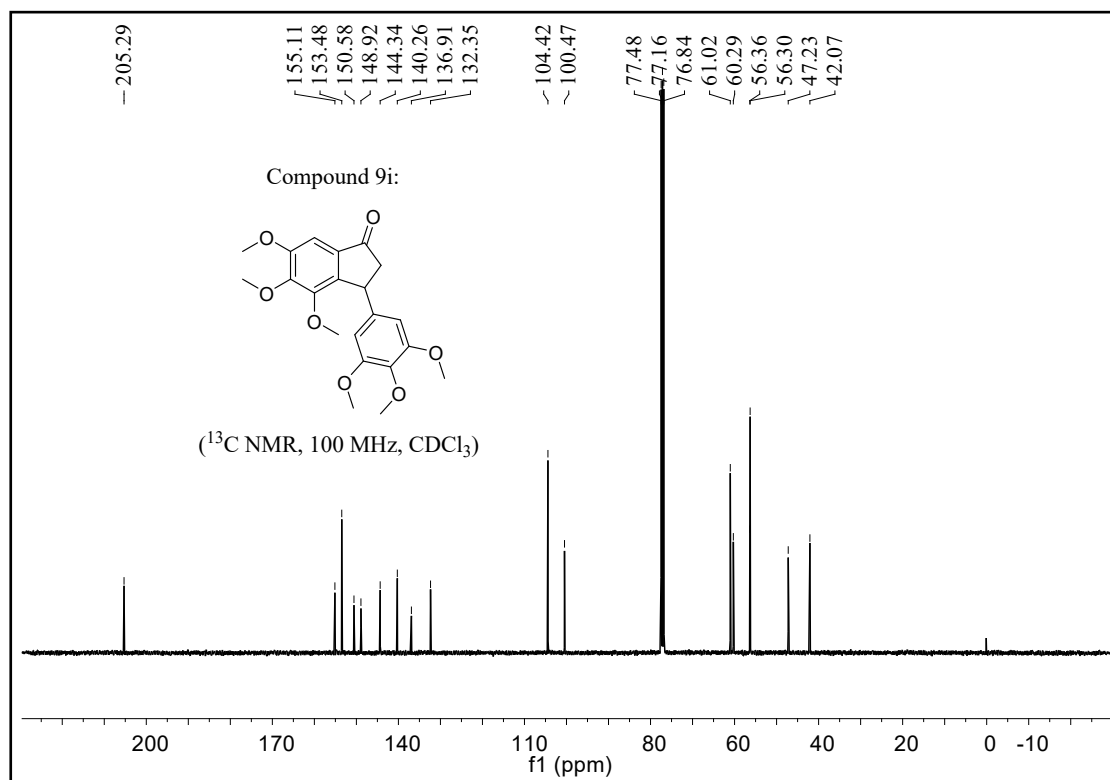

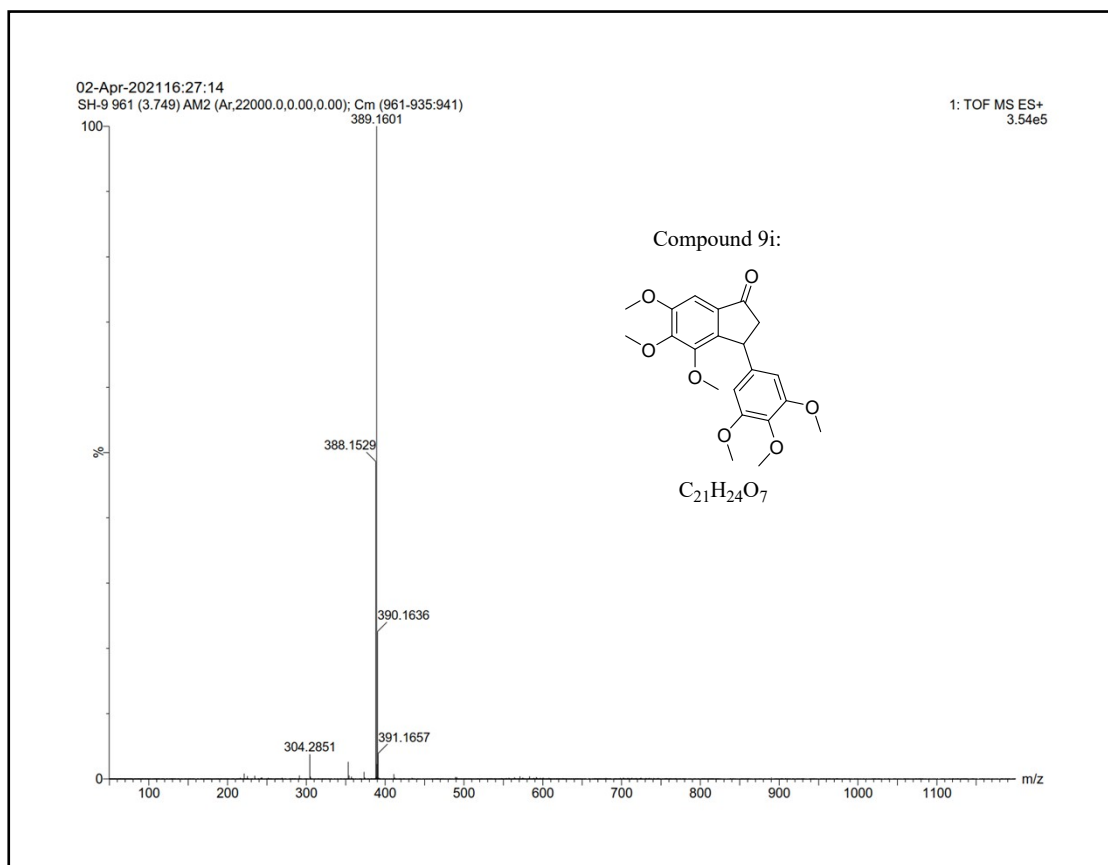

3-(4-Ethoxyphenyl)-4,5,6-trimethoxy-2,3-dihydro-1H-inden-1-one (**9j**)

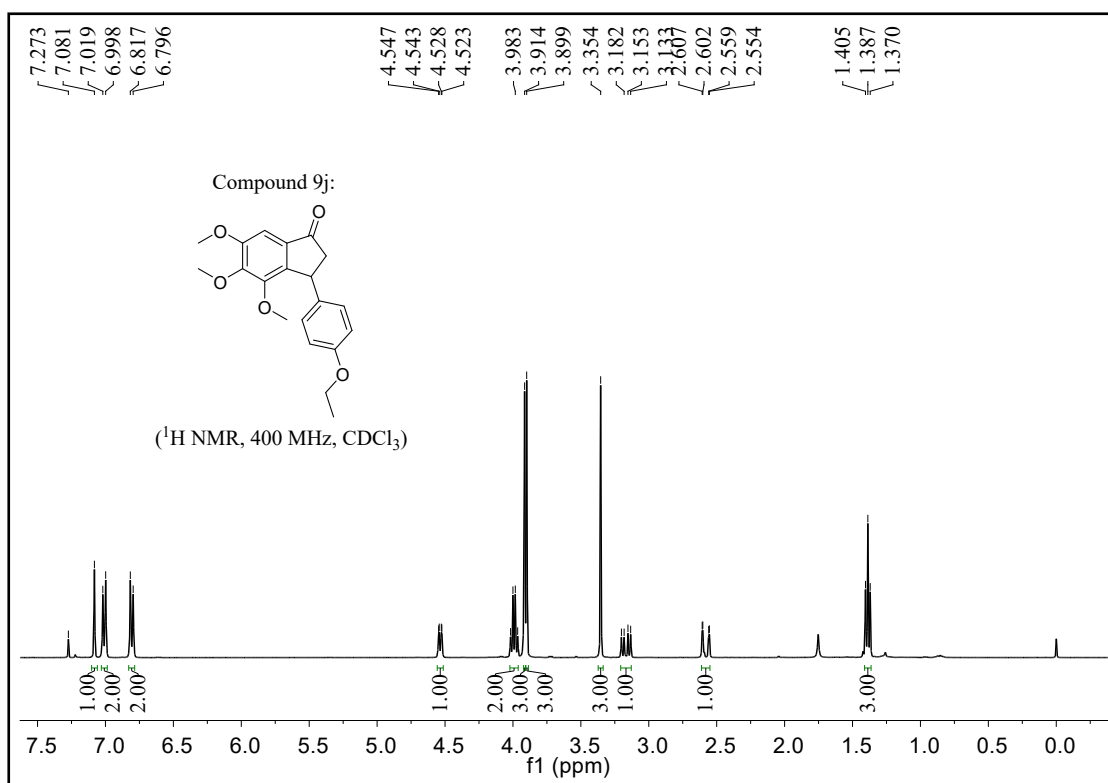

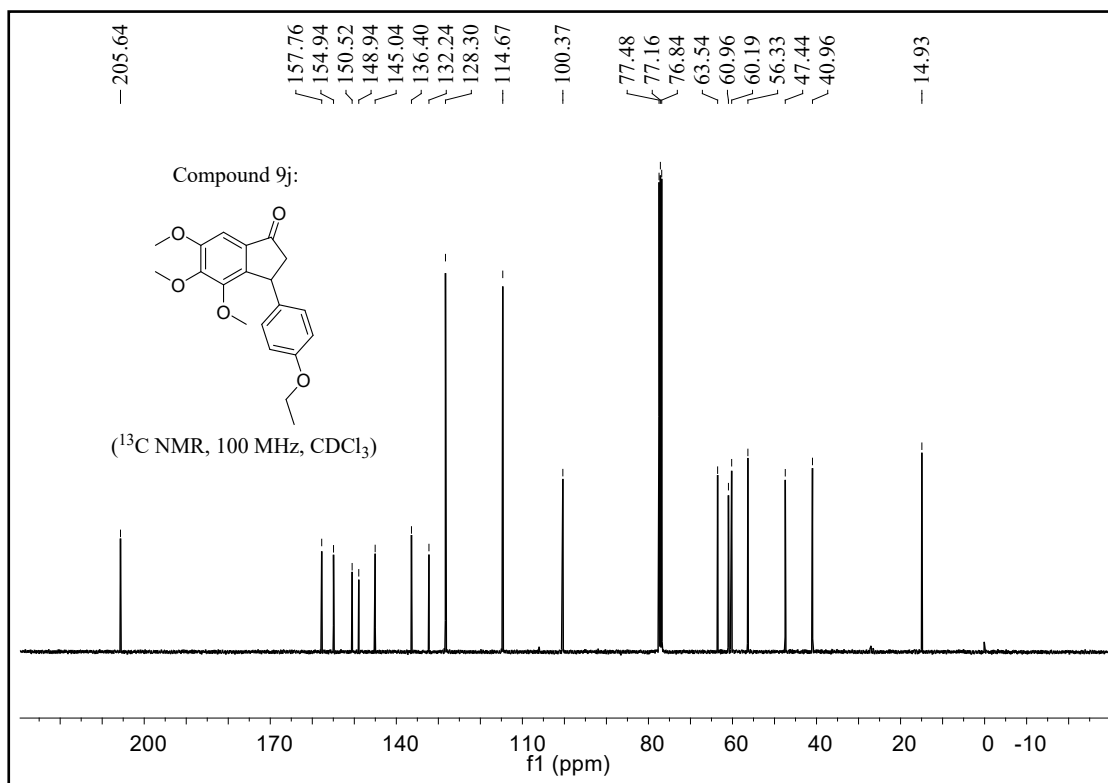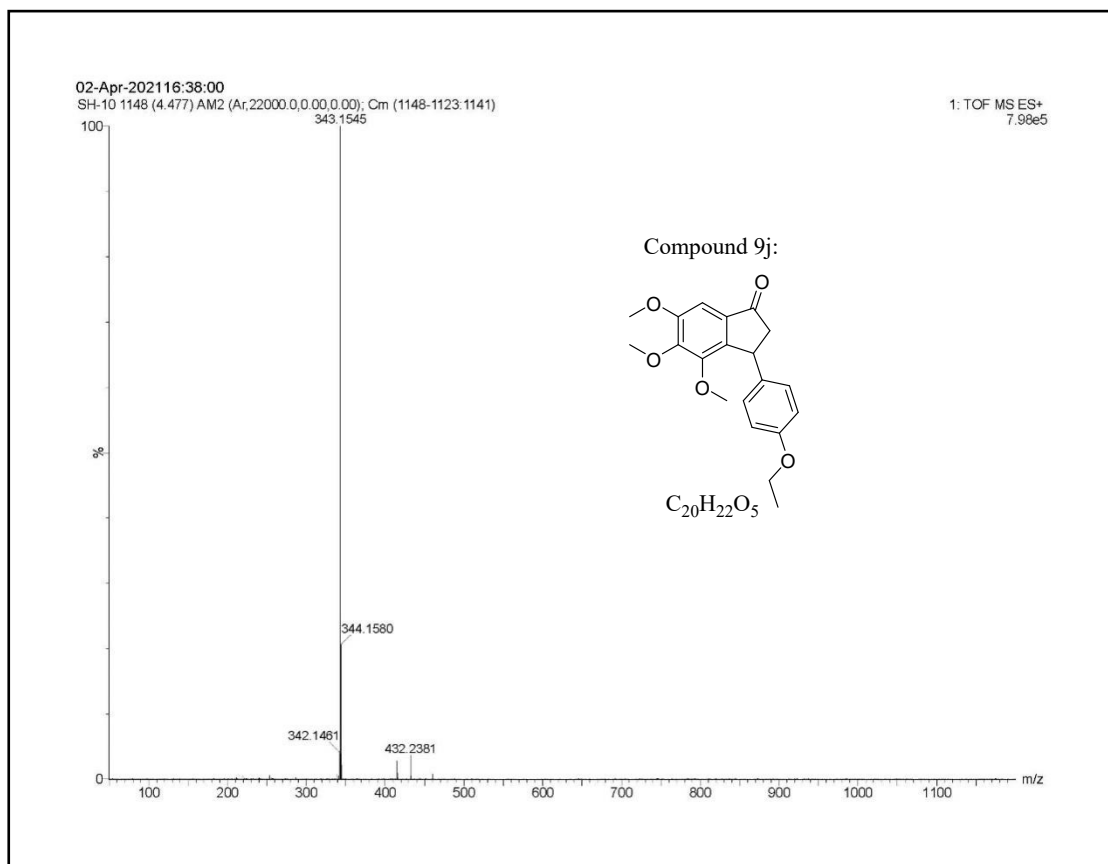

3-(4-Ethoxy-3-fluorophenyl)-4,5,6-trimethoxy-2,3-dihydro-1H-inden-1-one (**9k**)

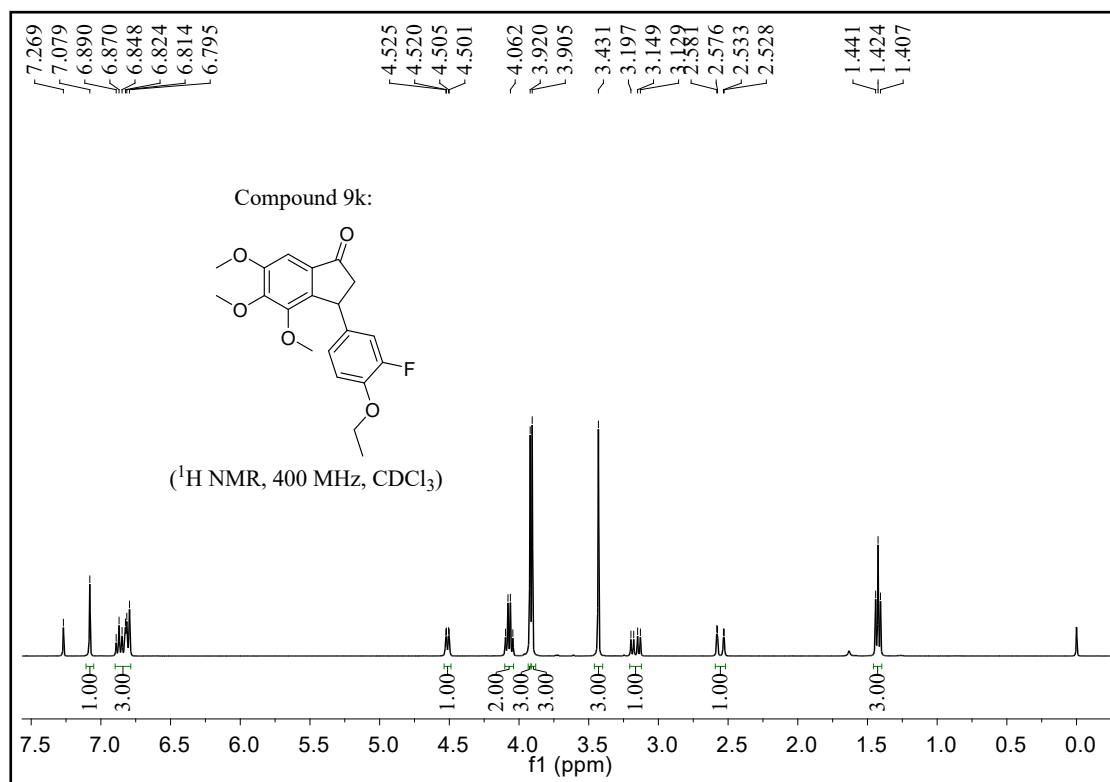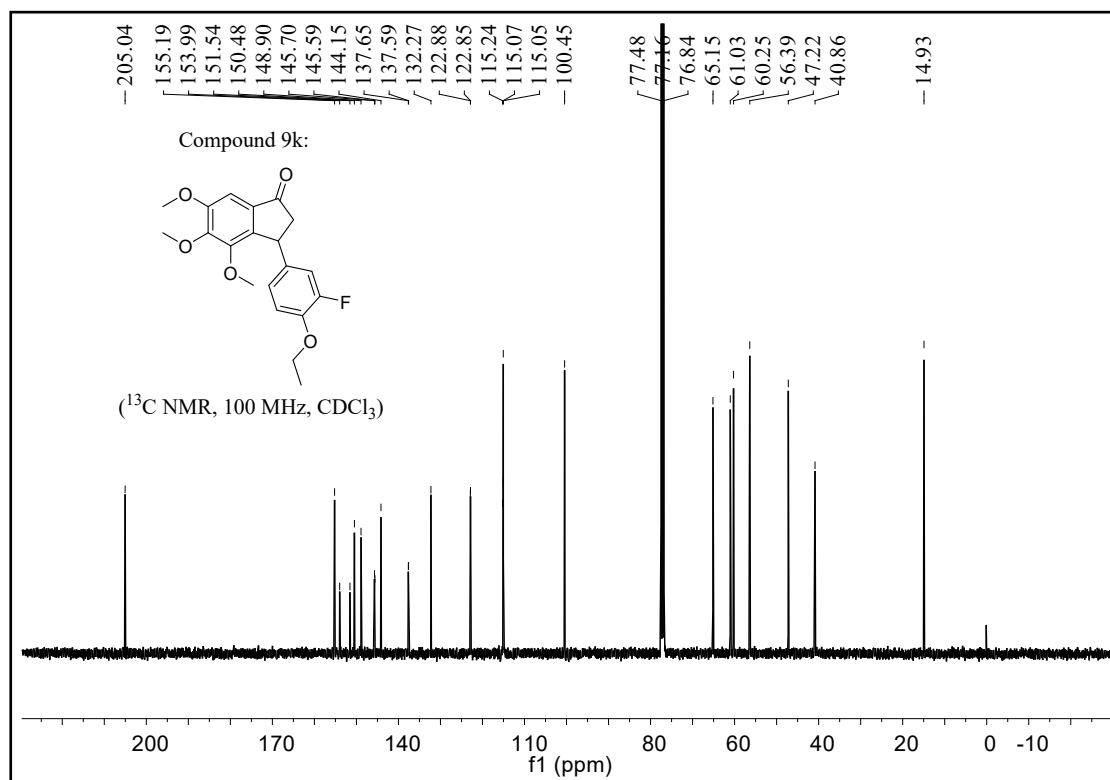

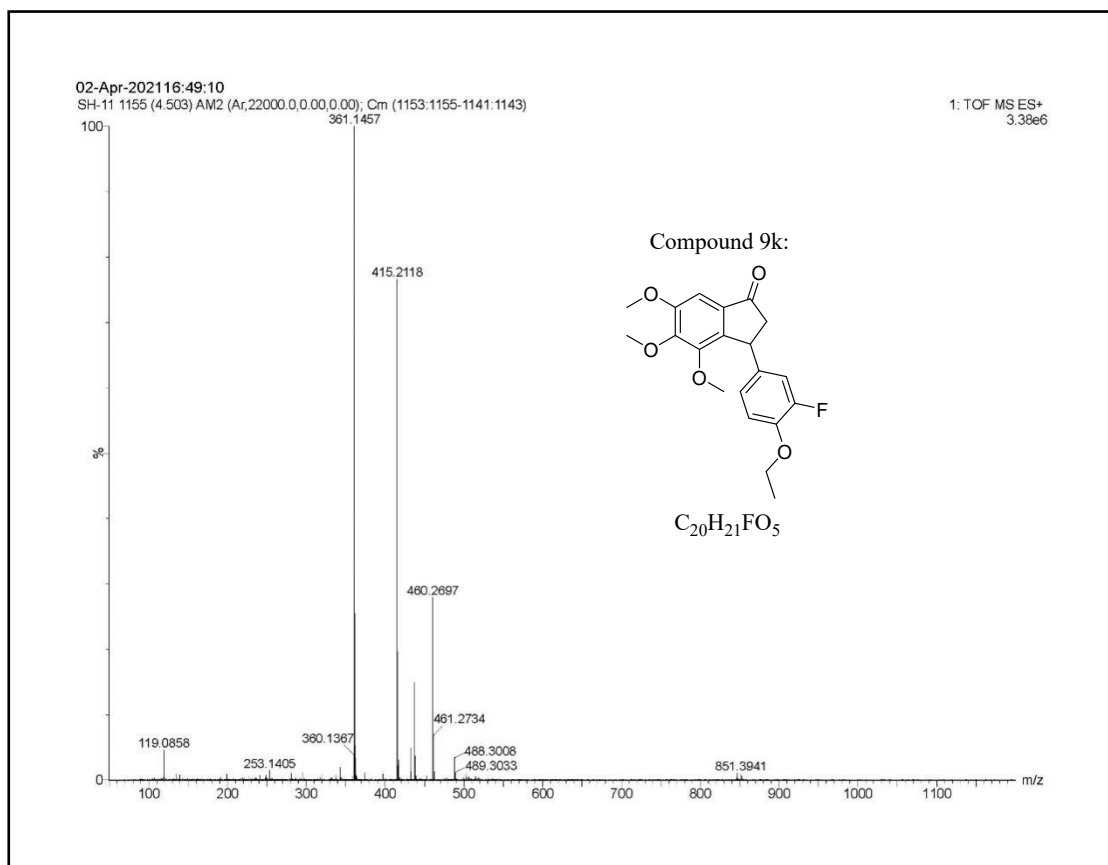

3-(3-Chloro-4-ethoxyphenyl)-4,5,6-trimethoxy-2,3-dihydro-1H-inden-1-one (**9l**)

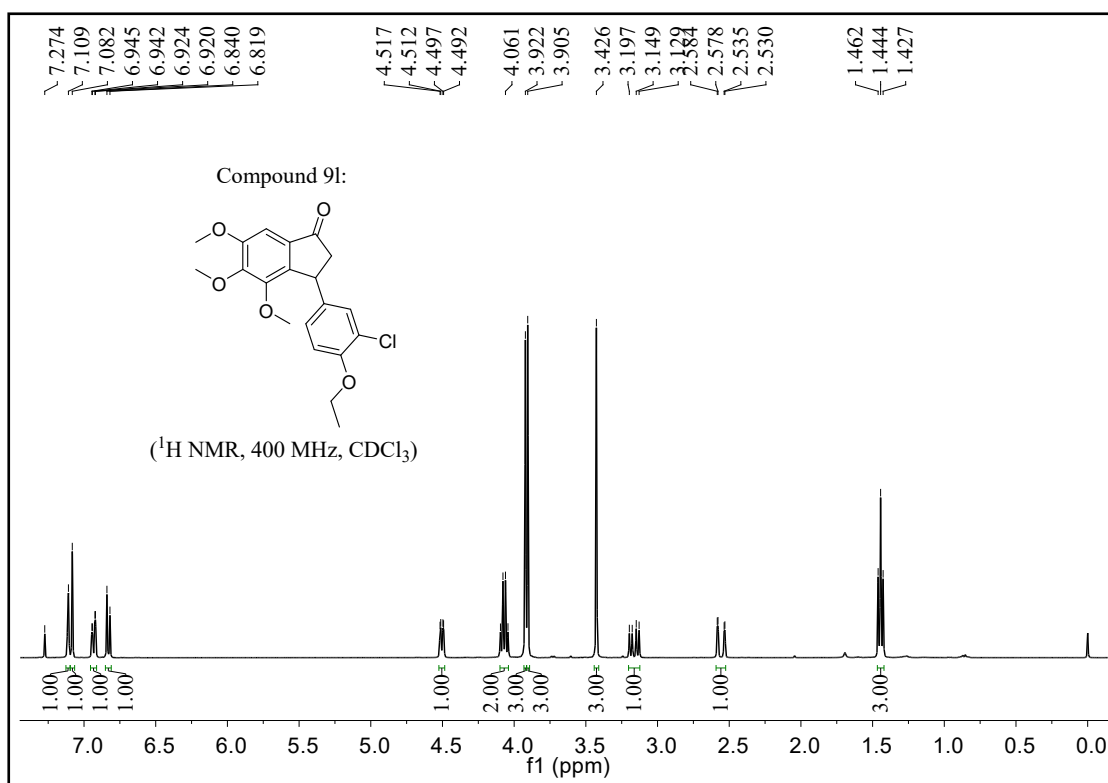

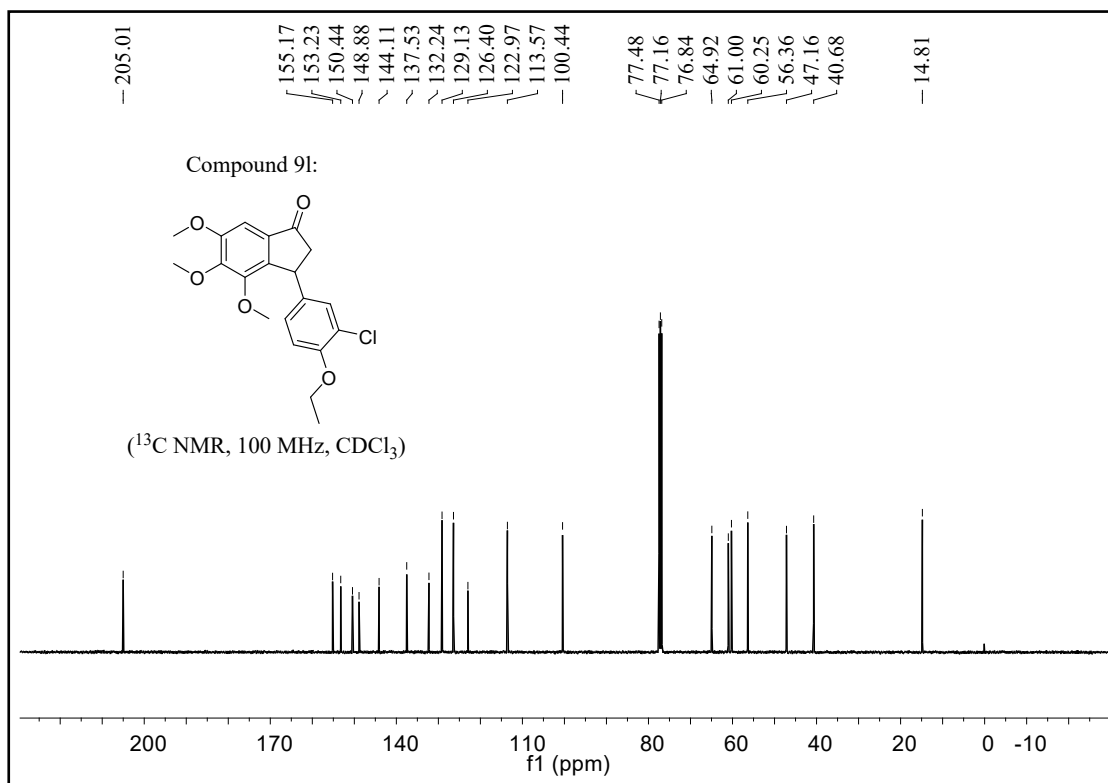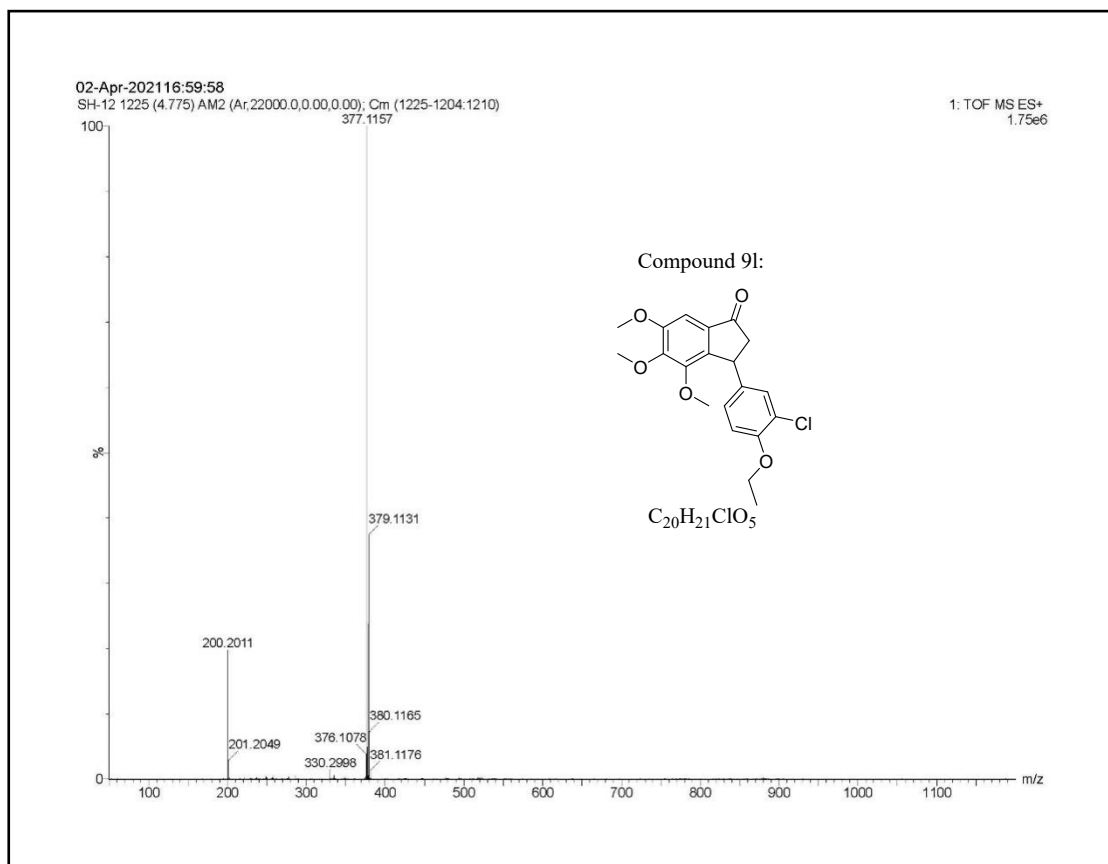

3-(3-Bromo-4-ethoxyphenyl)-4,5,6-trimethoxy-2,3-dihydro-1H-inden-1-one (**9m**)

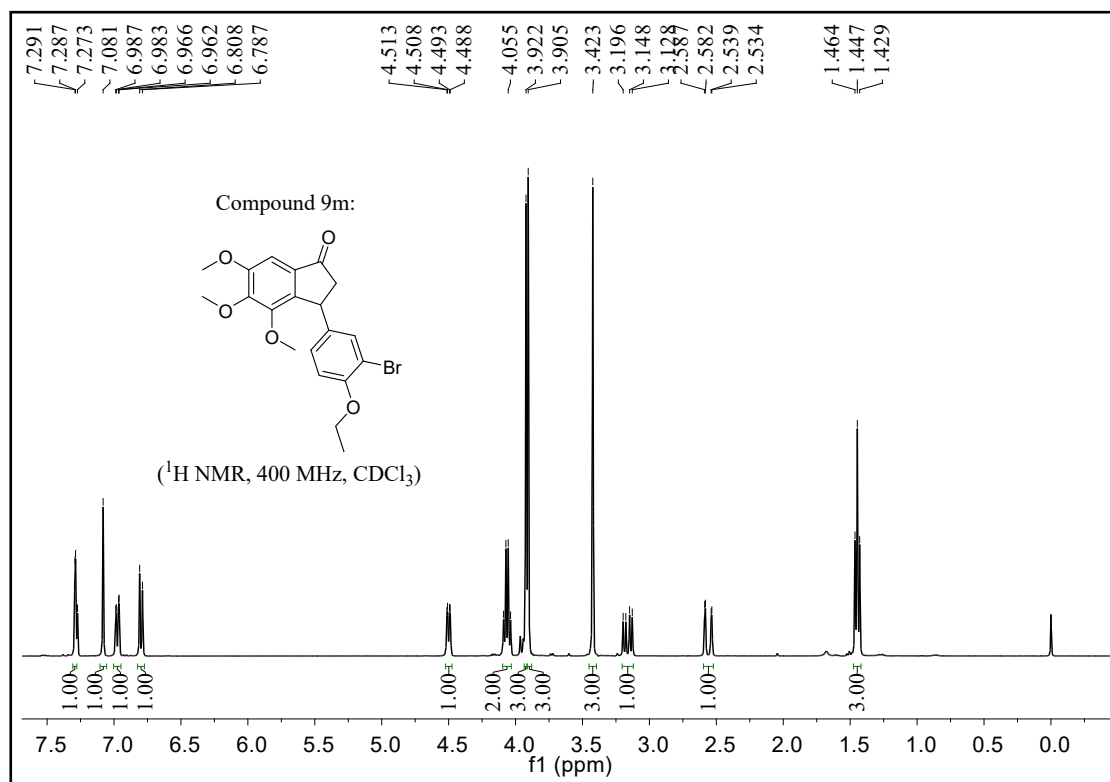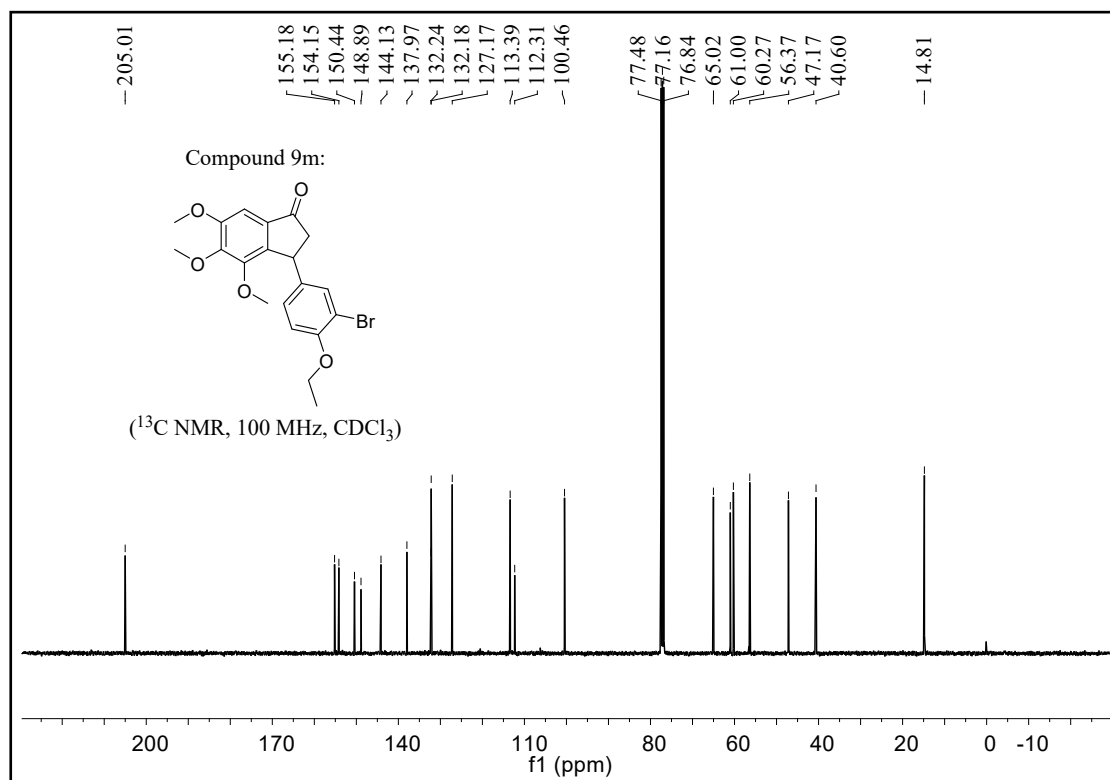

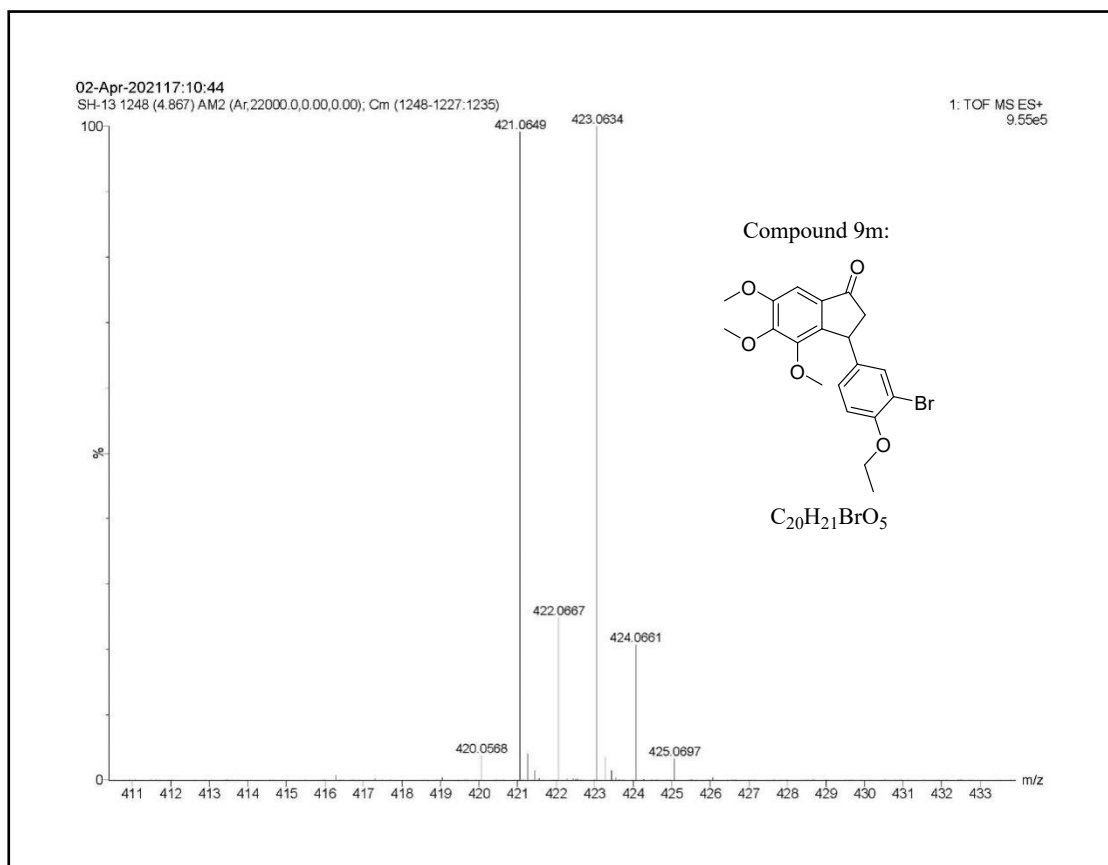

3-(4-Isopropoxyphenyl)-4,5,6-trimethoxy-2,3-dihydro-1H-inden-1-one (**9n**)

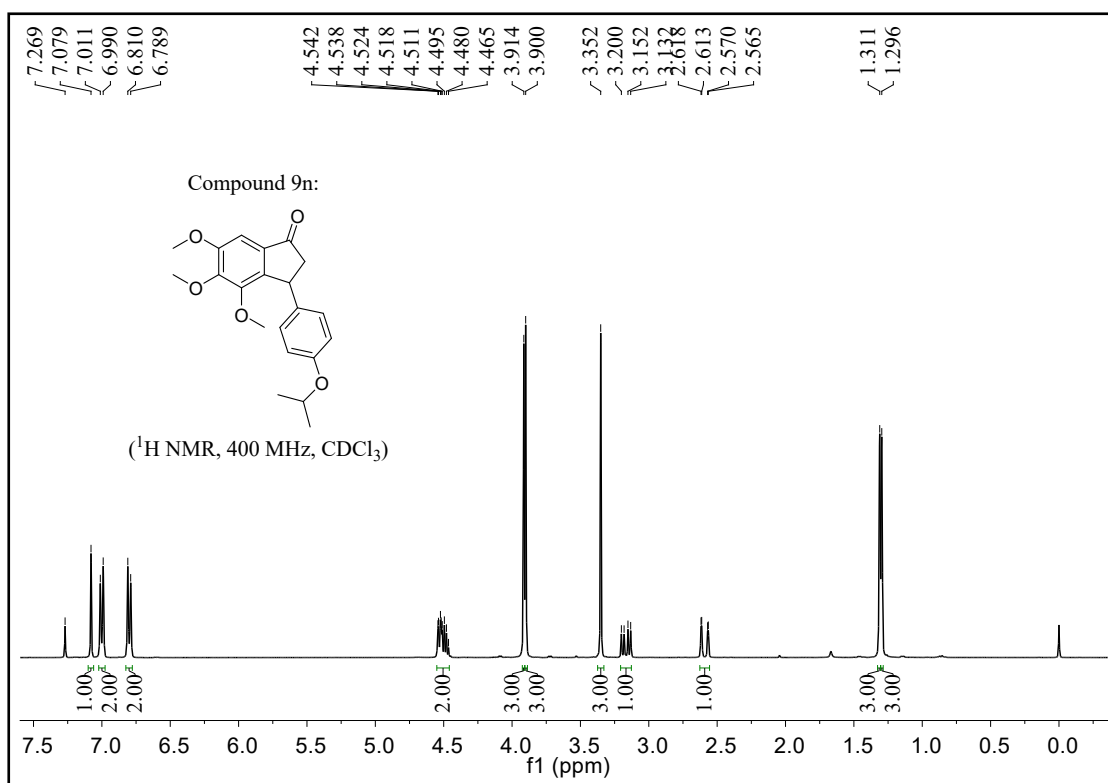



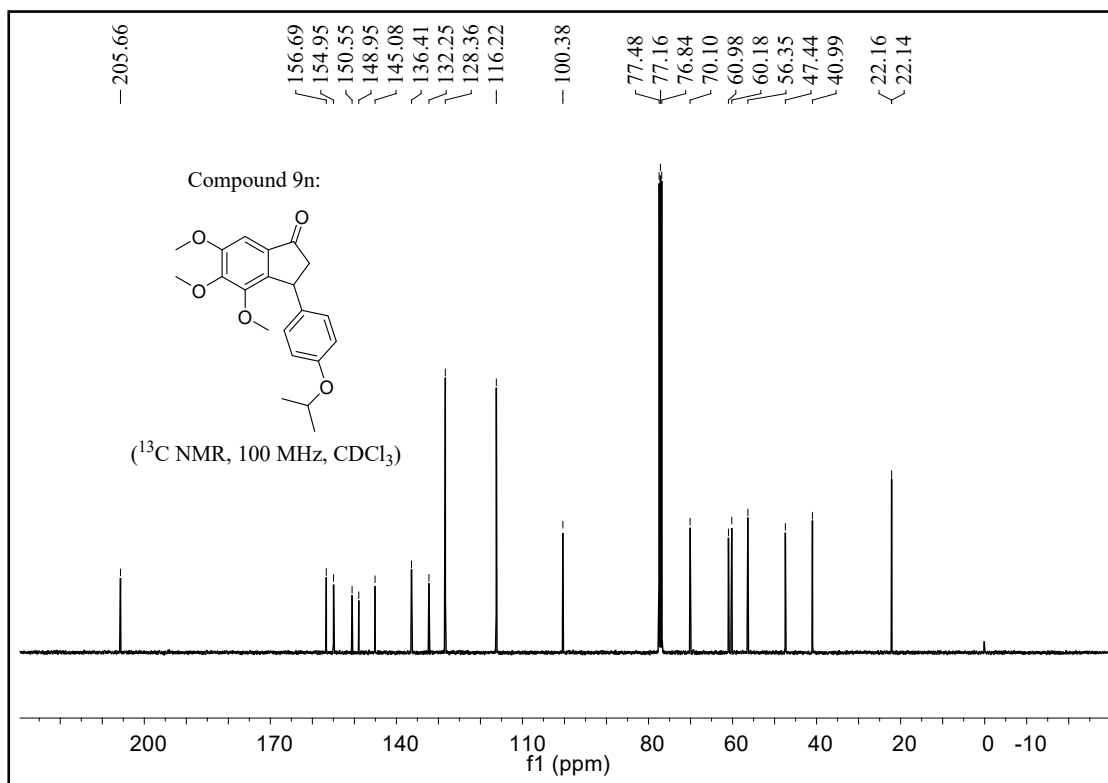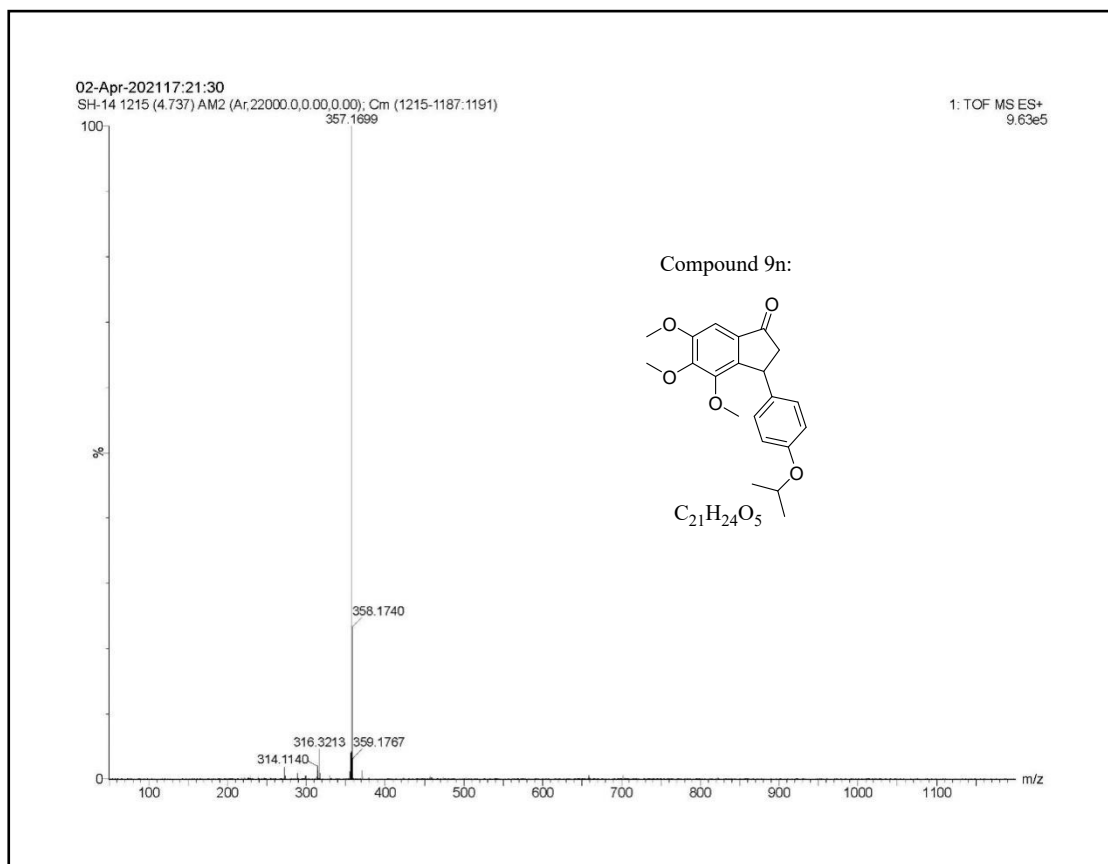

3-(4-(tert-Butoxy)phenyl)-4,5,6-trimethoxy-2,3-dihydro-1H-inden-1-one (**9o**)

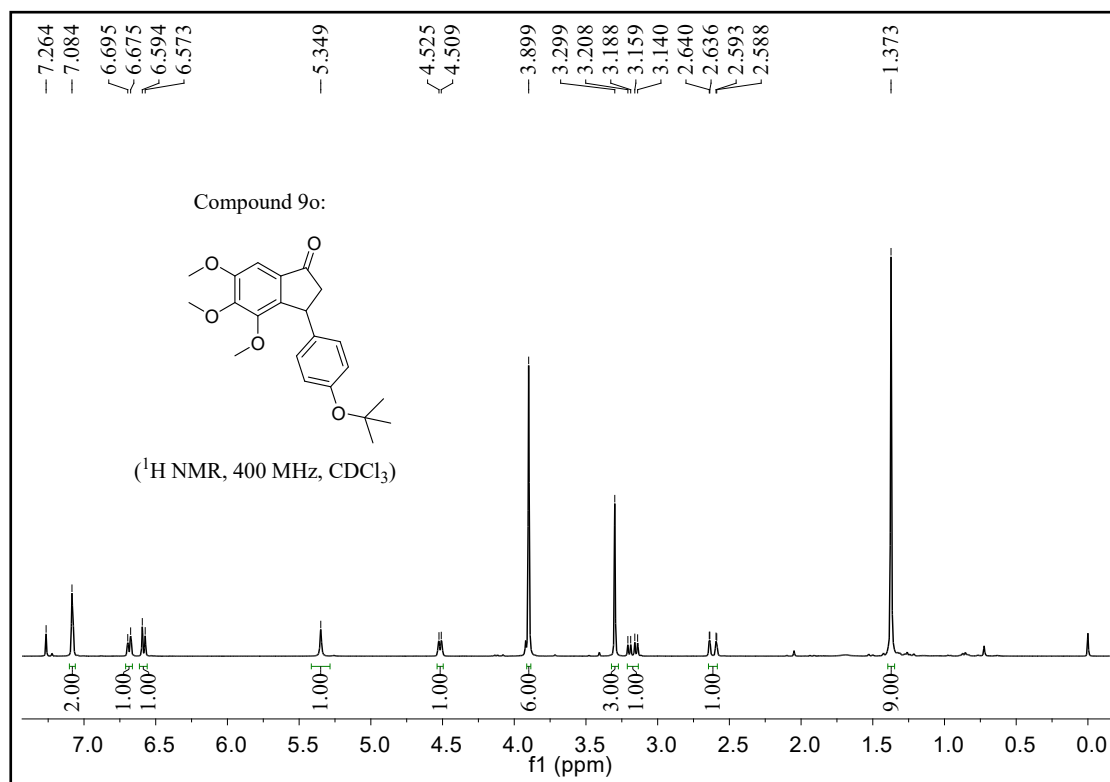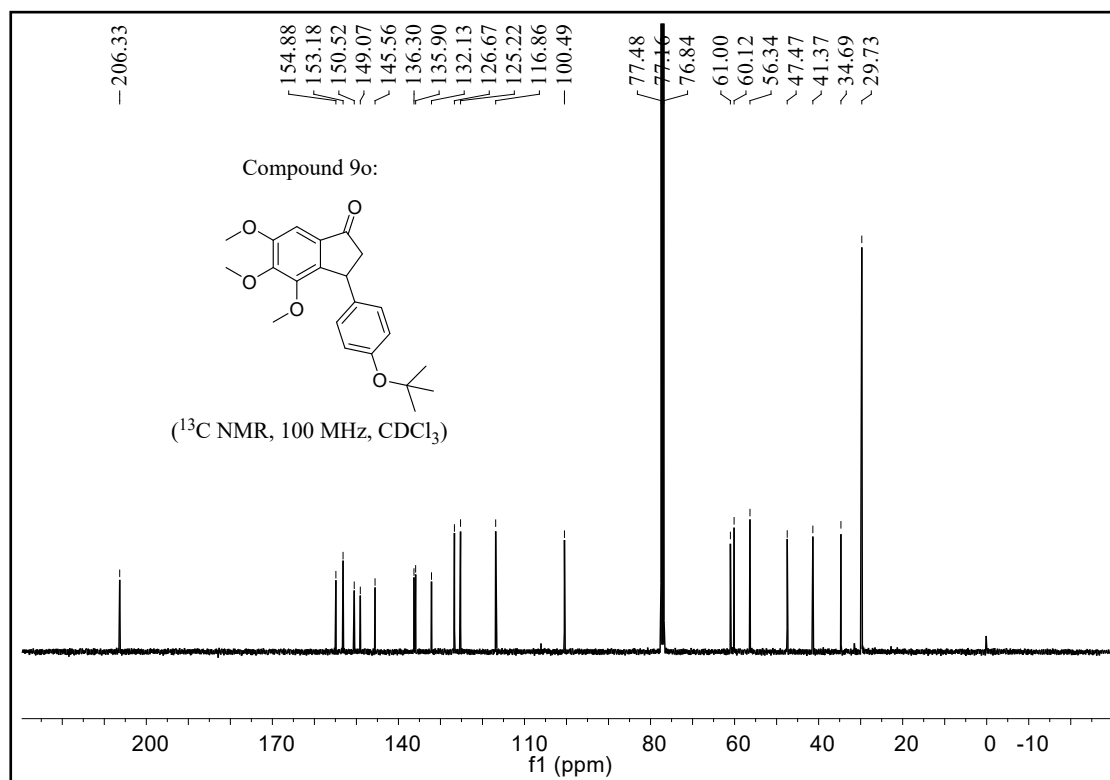

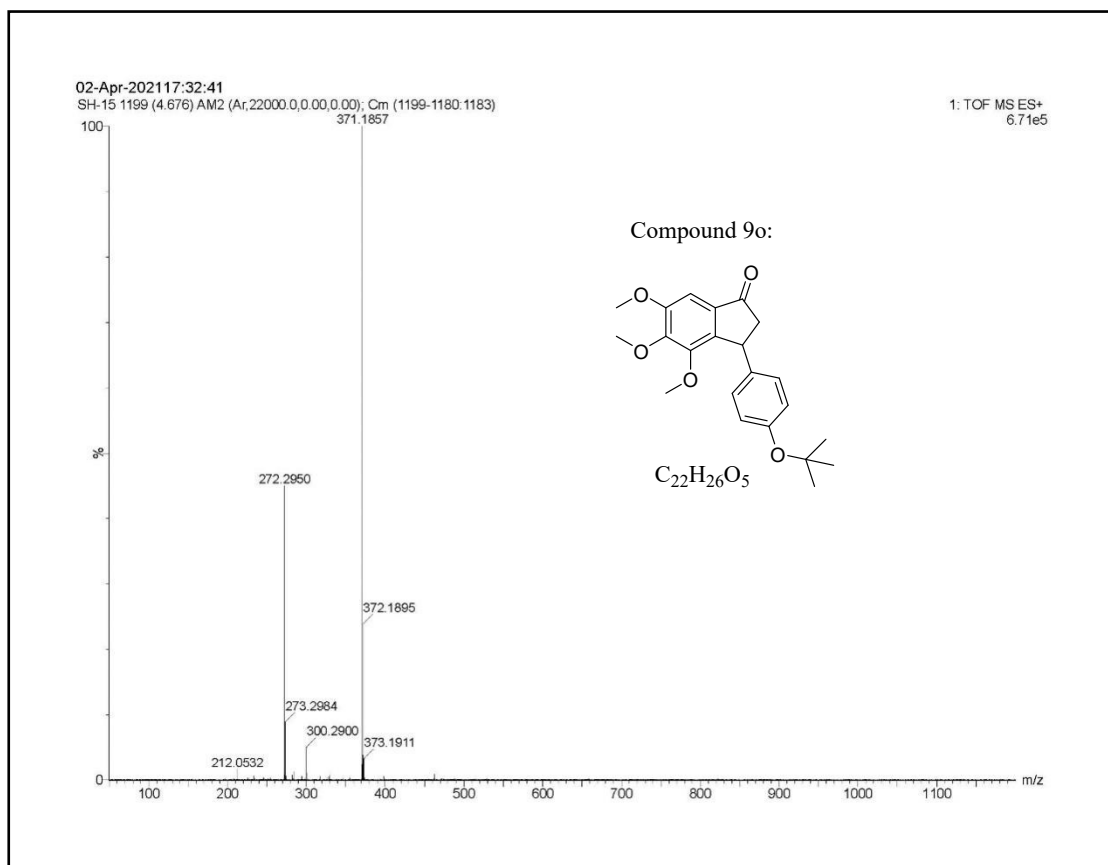

4,5,6-Trimethoxy-3-(4-(methylthio)phenyl)-2,3-dihydro-1H-inden-1-one (**9p**)

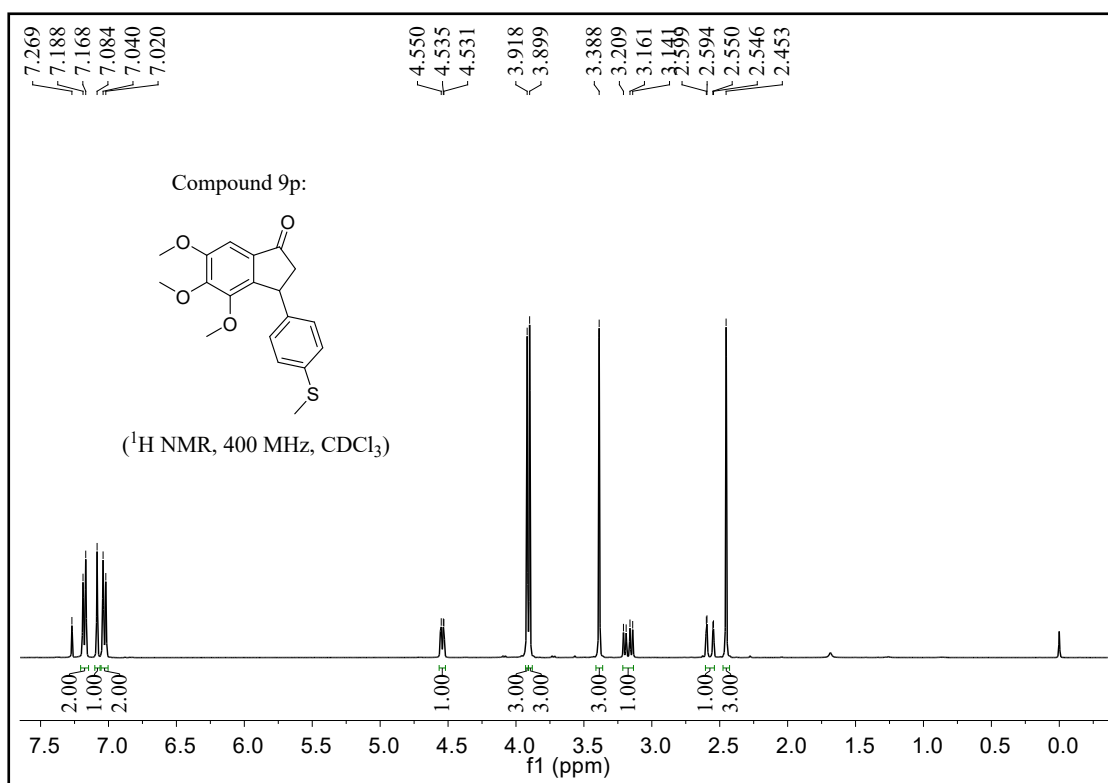

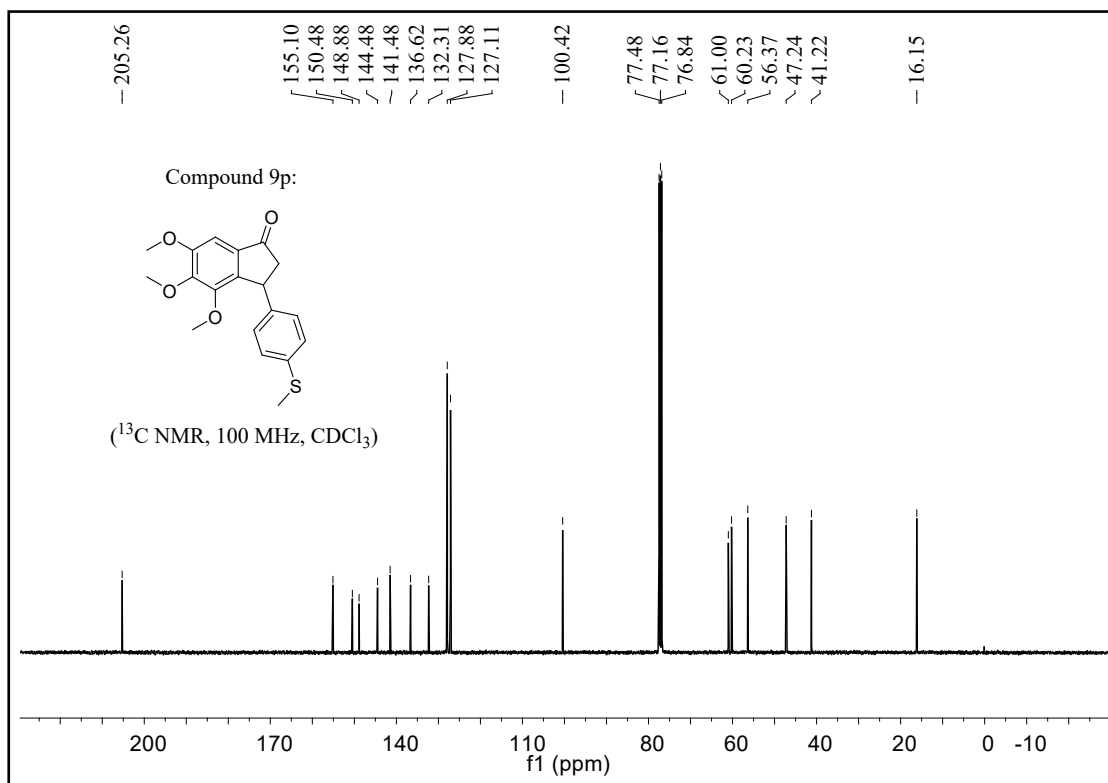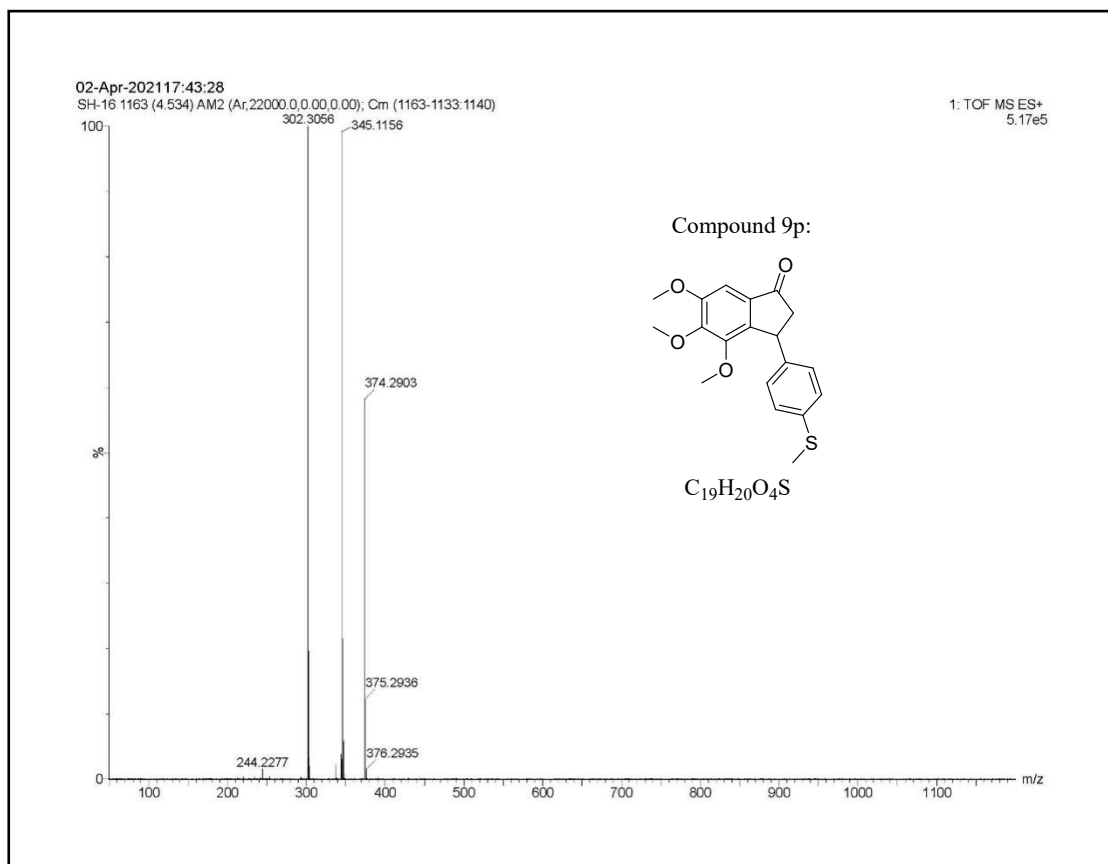

3-(4-Chloro-3-methoxyphenyl)-4,5,6-trimethoxy-2,3-dihydro-1H-inden-1-one (**9q**)

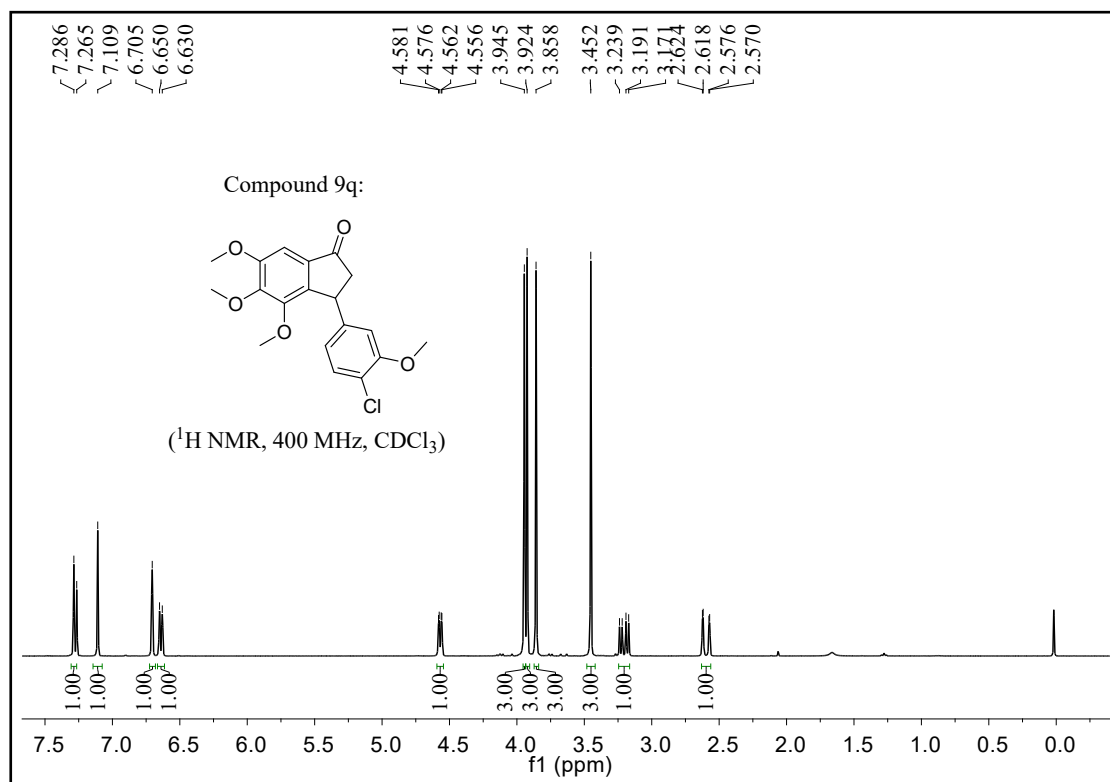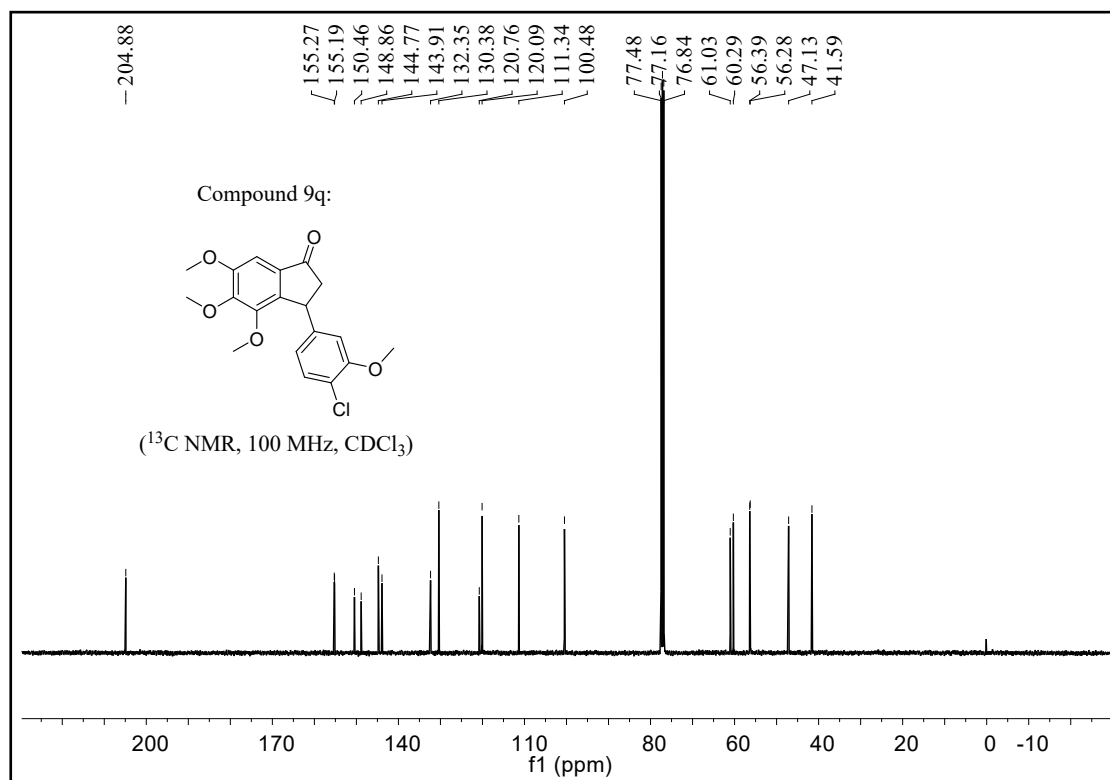

02-Apr-2021 17:54:15  
SH-17 1159 (4.518) AM2 (Ar, 22000.0, 0.00, 0.00); Cm (1159-1130:1142)

1: TOF MS ES+  
1.53e6

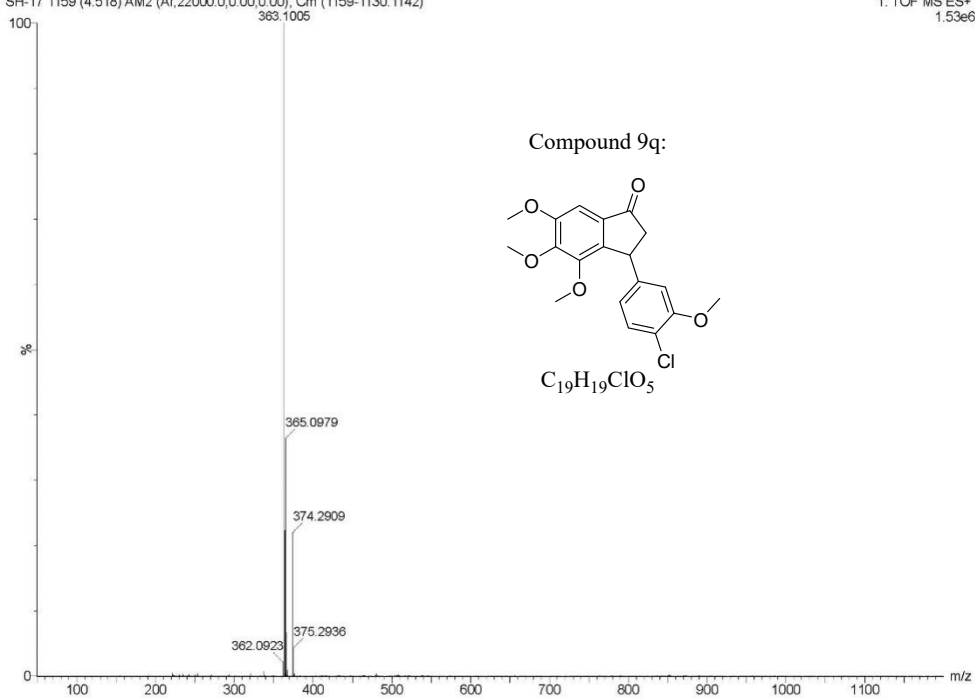

Compound 9q:

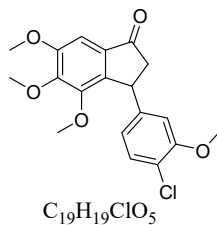

Compounds **11** and **13** were fully characterized by  $^1\text{H}$  NMR and  $^{13}\text{C}$  NMR.

2-((*R*)-*p*-methylsulfoxide)-1-(3,4,5-trimethoxyphenyl)ethan-1-one (**11**)

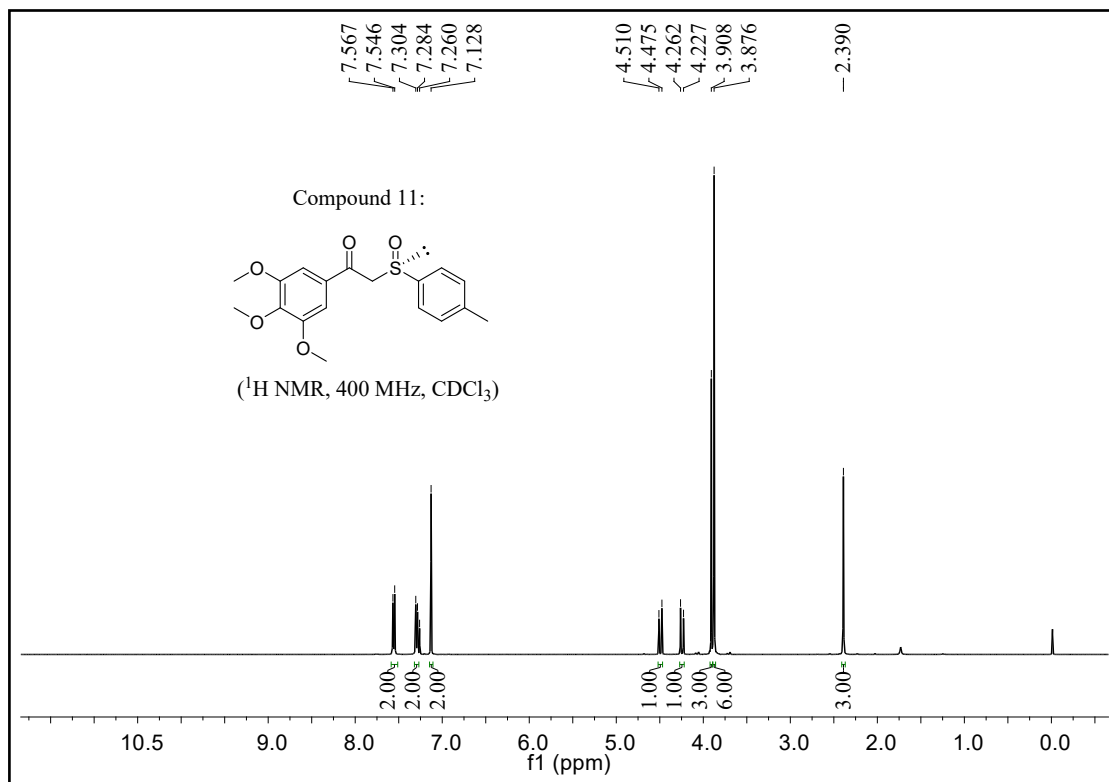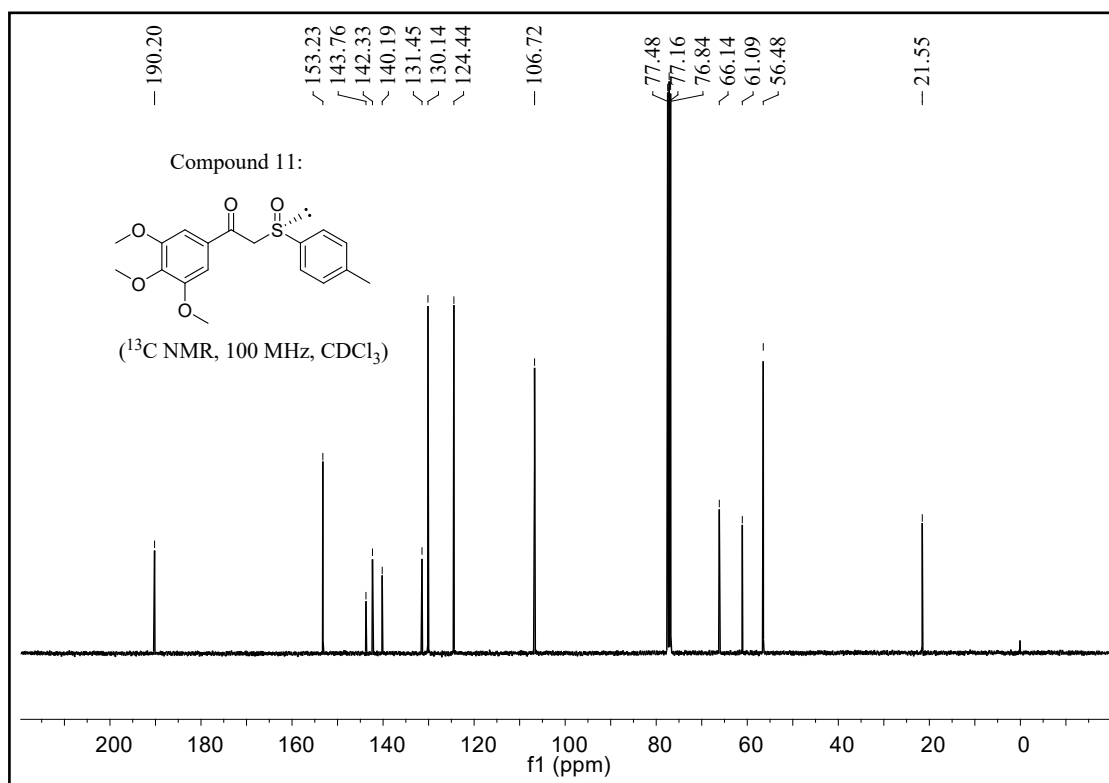

3-(4-Ethoxy-3-fluorophenyl)-4,5,6-trimethoxy-2-((*R*)-*p*-methylsulfoxide)-2,3-dihydro-1H-inden-1-one (**13**)

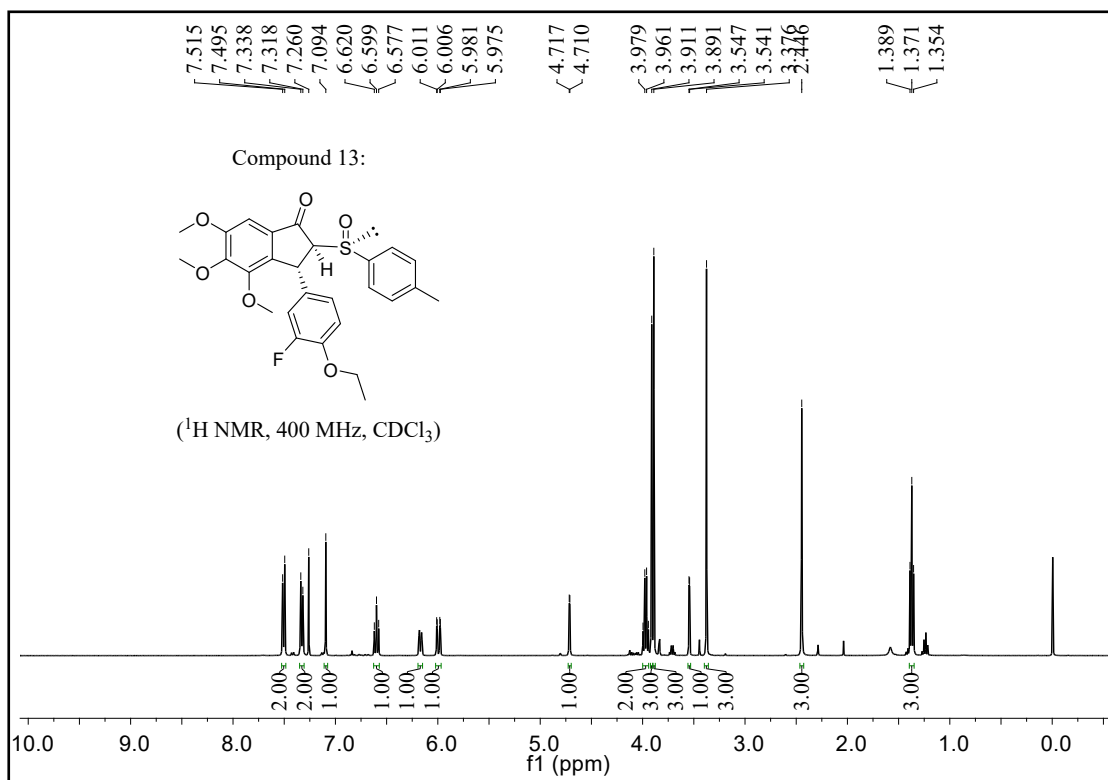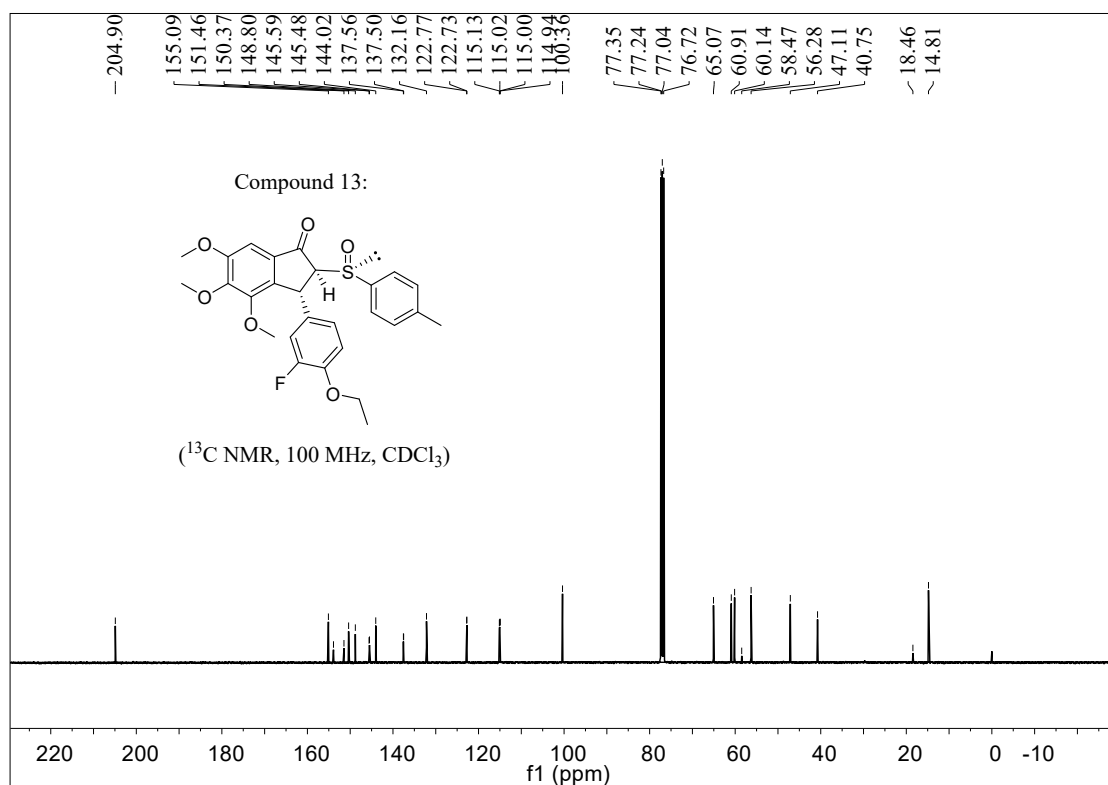



### X-Ray Structures of (*R*)-**9k**.

ORTEP drawing of the X-ray crystallographic structure of compound (*R*)-**9k** (50% probability ellipsoids):

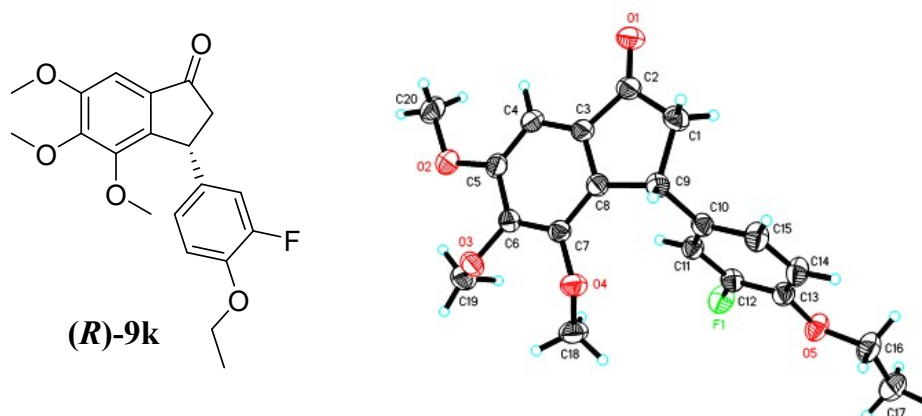

|                                 |                                                 |
|---------------------------------|-------------------------------------------------|
| Identification code             | <b>(R)-9k</b>                                   |
| Empirical formula               | C <sub>20</sub> H <sub>21</sub> FO <sub>5</sub> |
| Formula weight                  | 360.37                                          |
| Temperature                     | 293(2) K                                        |
| Wavelength                      | 1.54178 Å                                       |
| Crystal system                  | Monoclinic                                      |
| Space group                     | P 21                                            |
| Unit cell dimensions            | a = 14.3474(5) Å                                |
|                                 | b = 4.42800(10) Å                               |
|                                 | c = 14.8423(5) Å                                |
| Volume                          | 886.60(5) Å <sup>3</sup>                        |
| Z                               | 2                                               |
| Density (calculated)            | 1.350 Mg/m <sup>3</sup>                         |
| Absorption coefficient          | 0.864 mm <sup>-1</sup>                          |
| F(000)                          | 380                                             |
| Crystal size                    | 0.190 x 0.100 x 0.070 mm <sup>3</sup>           |
| Theta range for data collection | 8.214 to 66.387°.                               |
| Index ranges                    | -17<=h<=17, -5<=k<=4, -16<=l<=17                |
| Reflections collected           | 10827                                           |
| Independent reflections         | 2940 [R(int) = 0.0326]                          |

|                                   |                                             |
|-----------------------------------|---------------------------------------------|
| Completeness to theta = 67.679°   | 92.7 %                                      |
| Absorption correction             | Semi-empirical from equivalents             |
| Max. and min. transmission        | 0.7533 and 0.4831                           |
| Refinement method                 | Full-matrix least-squares on F <sup>2</sup> |
| Data / restraints / parameters    | 2940/1/240                                  |
| Goodness-of-fit on F <sup>2</sup> | 1.078                                       |
| Final R indices [I>2sigma(I)]     | R1 = 0.0320, wR2 = 0.0844                   |
| R indices (all data)              | R1 = 0.0356, wR2 = 0.0872                   |
| Absolute structure parameter      | 0.08(5)                                     |
| Extinction coefficient            | 0.037(8)                                    |
| Largest diff. peak and hole       | 0.115 and -0.101 e.Å <sup>-3</sup>          |

CCDC 2180666. For detailed crystallographic data, please refer to the Cambridge Crystallographic Data Centre at <http://ccdc.cam.ac.uk>.
